# Supplementary material for: Synthesis, properties and application of o-carborane-based π-conjugated macrocycles
Source: Royal Society of Chemistry journal article supplement (doi:10.1039/d3qo00487b), 2023-01-01
Supplement: d3qo00487b1.pdf [file d3qo00487b1.pdf]

## Supporting Information

### The Synthesis, Property, and Application of $\sigma$ -carborane based $\pi$ -Conjugated Macrocycles

Qi Qu,<sup>a</sup> Meigui Fu,<sup>a</sup> Caixia Lin,<sup>a</sup> Yanhou Geng,<sup>\*b</sup> Yuanming Li,<sup>\*a</sup> and Yaofeng  
Yuan<sup>\*a</sup>

*a* Key Laboratory of Molecule Synthesis and Function Discovery (Fujian Province University), Department of Chemistry, Fuzhou University, Fuzhou 350108, China.

*b* School of Materials Science and Engineering and Tianjin Key Laboratory of Molecular Optoelectronic Science, Tianjin University, Tianjin 300072, China; Joint School of National University of Singapore and Tianjin University, International Campus of Tianjin University, Fuzhou 350207, China.

Email: yanhou.geng@tju.edu.cn; yuanming.li@fzu.edu.cn; yaofeng.yuan@fzu.edu.cn

### Table of Contents

|                                                  |            |
|--------------------------------------------------|------------|
| <b>1. Materials and Methods .....</b>            | <b>S1</b>  |
| <b>2. Synthesis Section .....</b>                | <b>S2</b>  |
| <b>3. Crystal data and DFT Calculations.....</b> | <b>S8</b>  |
| <b>4. Fluorescence Properties .....</b>          | <b>S18</b> |
| <b>5. References .....</b>                       | <b>S30</b> |
| <b>6. Structural Characterization.....</b>       | <b>S32</b> |

---

## 1. Materials and Methods

All commercially available reagents and solvents were used as received without further purification unless noted otherwise. The  $^1\text{H}$ ,  $^{13}\text{C}$ , and  $^{11}\text{B}$  NMR spectra were measured at room temperature by using a JEOL JNM-ECZ500R/S1 or Bruker AVANCE NEO 400. HRMS were obtained on an Exactive plus LC-MS (ESI) mass spectrometer. UV-visible absorption spectra were recorded on a PerkinElmer Lambda750 UV-vis/NIR spectrophotometer. The instrument used for the fluorescence test in solution is a Hitachi F4600. Steady-state fluorescence and lifetime measurements were carried out on an Edinburgh Instruments (EI) FLS980 fluorescence spectrophotometer equipped with a xenon arc lamp (Xe1). Photoluminescence quantum yield ( $\Phi_{\text{PL}}$ ) was obtained via "Integrated Sphere" using Spectrofluorometer FLS1000 equipped with a xenon lamp as the excitation source. Transmission electron microscope (TEM) images were acquired with an FEI-\*/TECNAI G2 F20. Element analysis were acquired with an Elementar Vario EL Cube. X-ray single crystal diffraction data for the **4a** and **4b** in PE/THF mixture was collected on a Bruker Apex diffractometer and 1.5 kW graphite monochromated Mo-K $\alpha$  ( $\lambda = 0.71073$ ) and Cu-K $\alpha$  radiation ( $\lambda = 1.54184 \text{ \AA}$ ). The crystal was kept at 296.15 K during data collection. Using the Olex2 graphical program,<sup>1</sup> the structure was solved using SHELXT 2018. Structure solution and refinement of the structure have been done using SHELXL 2018.<sup>2</sup> Density functional theory (DFT) calculations were carried out using Gaussian 09(Revision C.01) program.<sup>3</sup> Molecular geometry was optimized using B3LYP/6-31G(d) basis set.

---

## 2. Synthesis Section

### Synthesis of compound **1b**

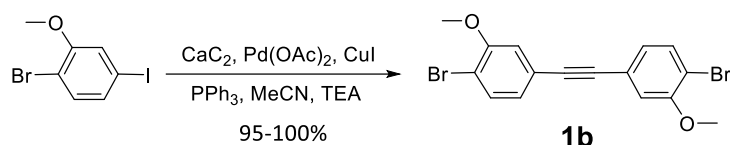

A 250 mL round bottom flask with a magnetic stir bar was charged with 2-bromo-5-iodoanisole (1.25 g, 4mmol),  $\text{CuI}$  (76.2 mg, 0.4mmol), and  $\text{Pd}(\text{OAc})_2$  (45 mg, 0.1 mmol),  $\text{CaC}_2$  (1.0 g, 12.0 mmol) and  $\text{PPh}_3$ (105.0 mg, 0.4 mmol). The flask was evacuated and refilled with nitrogen for 3 times. Then,  $\text{Et}_3\text{N}$ (30 mL) and acetonitrile(30 mL)were added. The mixturewas stirred at room temperature over night under nitrogen atmosphere. The reaction mixture was poured into water and then extracted with chloroform 3 times. The extract was washed with water, brine, and then dried over  $\text{Na}_2\text{SO}_4$ . After removed the solvent, the residue was then purified by silica gel column chromatography(PE:DCM = 4:1,  $R_f = 0.60$ ) to give **1b** as a white solid (760.3 mg, 1.9 mmol) in 95% yield. $^1\text{H}$  NMR (500 MHz, Chloroform-d)  $\delta$  7.51 (d,  $J = 8.1$  Hz, 2H), 7.04 (d,  $J = 1.8$  Hz, 2H), 7.01 (dd,  $J = 8.1, 1.8$  Hz, 2H), 3.92 (s, 6H). $^{13}\text{C}$  NMR (126 MHz, Chloroform-d)  $\delta$  155.8, 133.4, 125.1, 123.2, 114.7, 112.7, 89.4, 56.4. HR-MS (ESI)[ $\text{M}+\text{H}$ ] $^+$  calcd for  $\text{C}_{16}\text{H}_{13}\text{O}_2\text{Br}_2$ , 396.9256; found 396.9256.

## Synthesis of compound 2b

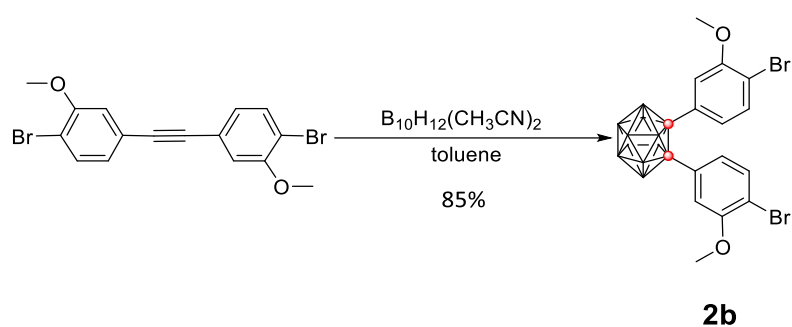

Under nitrogen atmosphere, a mixture of **1b** (693 mg, 1.75 mmol) and  $B_{10}H_{12}(CH_3CN)_2$  (530.8 mg, 2.625 mmol) in 50 mL distilled toluene was stirred at room temperature for 30 min. Then the system was heated to 110°C. After 18 h, the system was cooled down to room temperature. The residue was purified by silica gel column chromatography (PE:EA = 10:1,  $R_f = 0.65$ ) to give **2b** as a white solid (774.3 mg, 1.5 mmol) in 85% yield.  $^1H$  NMR (500 MHz, Chloroform-d)  $\delta$  7.35 (d,  $J = 8.4$  Hz, 2H), 6.94 (dd,  $J = 8.4, 2.3$  Hz, 2H), 6.88 (d,  $J = 2.3$  Hz, 2H), 3.76 (s, 6H), 3.63–0.97 (m, 10H).  $^{13}C$  NMR (126 MHz, Chloroform-d)  $\delta$  155.8, 133.4, 125.1, 123.2, 114.7, 112.7, 89.4, 56.4.  $^{11}B$  NMR (160 MHz, Chloroform-d)  $\delta$  0.09 – -5.13 (m), -8.51 – -13.16 (m). HR-MS (ESI)  $[M]^+$  calcd for  $C_{16}H_{22}B_{10}O_2Br_2$ , 511.1013; found 511.1021.

## Synthesis of compound 3a

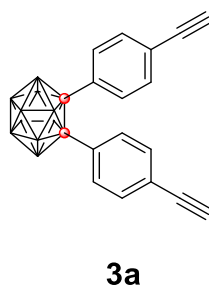

**3a** was synthesized according to the procedures previously reported in the literature.<sup>4,5</sup>

## Synthesis of compound **3b**

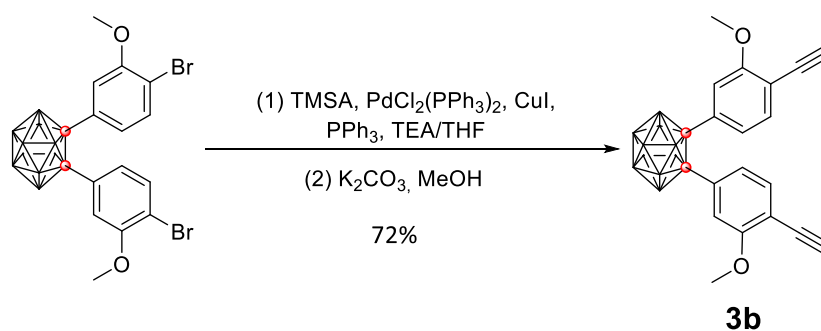

Into an oven-dried round-bottom flask were added compound **2b** (454.2mg, 1.0mmol), Pd(PPh<sub>3</sub>)<sub>2</sub>Cl<sub>2</sub>(14.0mg, 0.02 mmol), CuI (3.8 mg, 0.02 mmol), PPh<sub>3</sub>(5.3mg, 0.02mmol), degassed triethylamine (10 mL) and THF (30 mL), followed by injection of trimethylsilylacetylene (0.224 g, 2.4 mmol). The reaction mixture was refluxed for 36 h. After cooling to room temperature, the solid was filtered and the solvent was removed under vacuum. The mixture was added to a 250ml flask with proper amount of MeOH and K<sub>2</sub>CO<sub>3</sub> and stirred at room temperature for 2h. The extract was washed with water and brine and dried over Na<sub>2</sub>SO<sub>4</sub>. Evaporation of solvent followed by silica gel column chromatography(PE:DCM = 4:1, R<sub>f</sub> = 0.20) to give **3b** as a white solid (250.0 mg, 0.63 mmol) in 72% yield for the two steps. <sup>1</sup>H NMR (500 MHz, Chloroform-d) δ 7.25 (d, *J* = 8.2 Hz, 2H), 7.03 (dd, *J* = 8.1, 2.0 Hz, 2H), 6.86 (d, *J* = 1.9 Hz, 2H), 3.74 (s, 6H), 3.35 (s, 2H), 3.28 – 1.65 (m, 10H). <sup>13</sup>C NMR (126 MHz, Chloroform-d) δ 160.0, 133.8, 132.4, 122.9, 113.9, 112.9, 84.5, 83.8, 56.0. <sup>11</sup>B NMR (160 MHz, Chloroform-d) δ -3.23 (d, *J* = 128.6 Hz), -8.46 – -21.98 (m). HR-MS (ESI) [M+H]<sup>+</sup> calcd for C<sub>20</sub>H<sub>24</sub>B<sub>10</sub>O<sub>2</sub>, 405.2852; found 405.2850.

## Synthesis of compound 4a

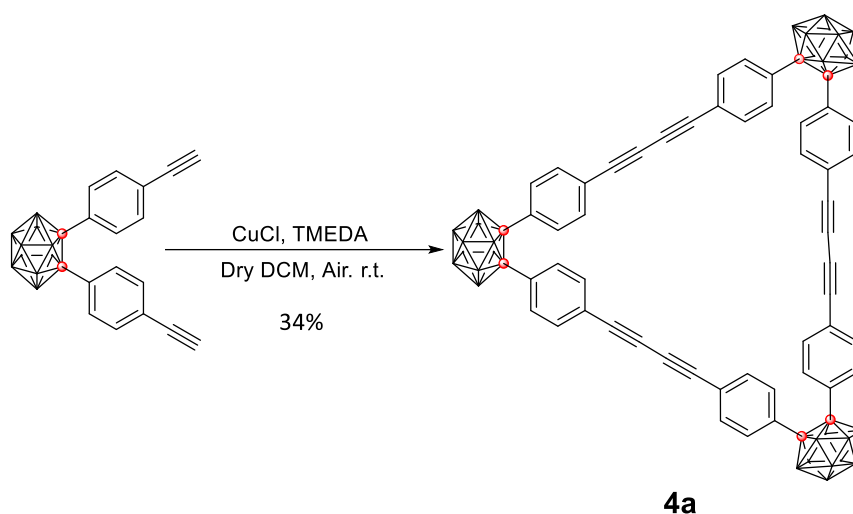

A solution of the **3a**<sup>4,5</sup> (172.0 mg, 0.5 mmol), CuCl (297.6 mg, 3 mmol), and N,N,N',N' -tetra-methylethylenediamine (TMEDA) (45  $\mu$ L, 3 mmol) in dry CH<sub>2</sub>Cl<sub>2</sub> (300 mL) was stirred for 24 h at room temperature. The reaction mixture was washed with water and brine and dried over anhydrous Na<sub>2</sub>SO<sub>4</sub>. Evaporation of the solvent followed by silica gel column chromatography (PE:THF = 5:1, R<sub>f</sub> = 0.65) to give **4a** (58.1 mg, 0.057 mmol) as a white solid in 34% yield. Elemental Anal. Calcd for C<sub>54</sub>H<sub>54</sub>B<sub>30</sub>: C, 63.13; H, 5.30. Found: C, 63.09; H, 5.29. M.p. > 300 °C; <sup>1</sup>H NMR (400 MHz, Chloroform-d)  $\delta$  7.41 (d, J = 8.2 Hz, 12H), 7.30 (d, J = 8.3 Hz, 12H), 2.85 (d, J = 284.2 Hz, 30H). <sup>13</sup>C NMR (101 MHz, Chloroform-d)  $\delta$  132.5, 131.3, 130.6, 123.9, 84.5, 80.8, 76.1. <sup>11</sup>B NMR (128 MHz, Chloroform-d)  $\delta$  -1.73, -10.48. HR-MS (ESI) [M+H]<sup>+</sup> calcd for C<sub>54</sub>H<sub>54</sub>B<sub>30</sub>, 1027.7308; found 1027.7316.

## Synthesis of compound 4b

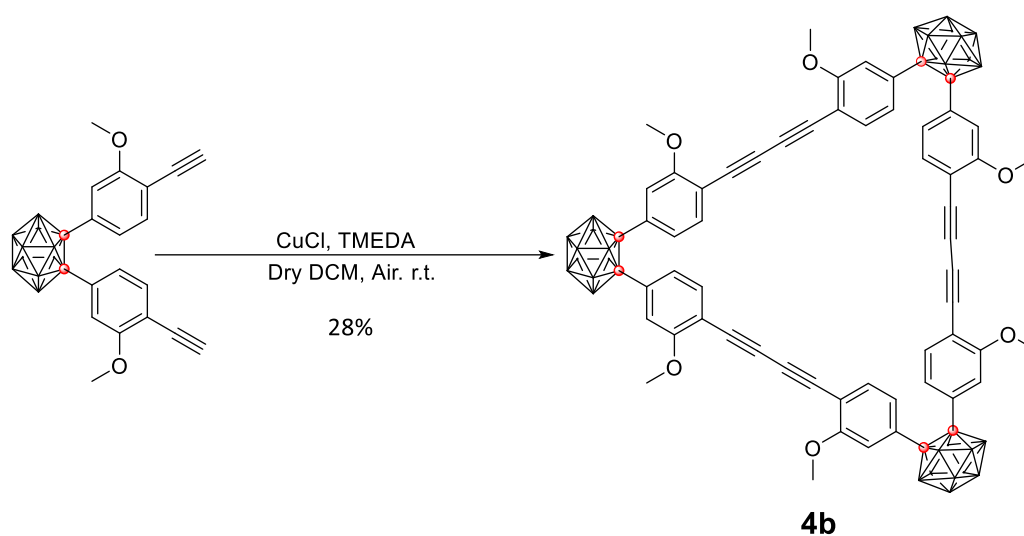

A solution of the **3b** (202 mg, 0.5 mmol), CuCl (297.6 mg, 3 mmol), and *N,N,N,N*-tetra-methylethylenediamine (TMEDA) (45  $\mu$ L, 3 mmol) in dry CH<sub>2</sub>Cl<sub>2</sub> (300 mL) was stirred for 24 h at room temperature. The reaction mixture was washed with water and brine and dried over anhydrous Na<sub>2</sub>SO<sub>4</sub>. Evaporation of the solvent followed by silica gel column chromatography (PE:THF = 10:1, R<sub>f</sub> = 0.40) to give **4b** (47.9 mg, 0.047 mmol) as a white solid in 28% yield. Elemental Anal. Calcd for C<sub>60</sub>H<sub>61</sub>B<sub>30</sub>O<sub>6</sub>: C, 59.68; H, 5.51. Found: C, 59.68; H, 5.62. M.p. > 300 °C. <sup>1</sup>H NMR (500 MHz, Chloroform-d)  $\delta$  7.25 (d, *J* = 8.0 Hz, 6H), 7.01 (d, *J* = 7.9 Hz, 6H), 6.88 (s, 6H), 3.75 (s, 18H), 2.84 (d, *J* = 322.2 Hz, 30H). <sup>13</sup>C NMR (101 MHz, Chloroform-d)  $\delta$  160.7, 134.0, 132.6, 122.8, 113.7, 113.0, 84.6, 80.0, 78.0, 55.9. <sup>11</sup>B NMR (128 MHz, Chloroform-d)  $\delta$  -2.67, -9.59. HR-MS (ESI) [M+H]<sup>+</sup> calcd for C<sub>60</sub>H<sub>66</sub>B<sub>30</sub>O<sub>6</sub>, 1207.7903; found 1207.7942.

### 3. Crystal Data and DFT Calculations

**Table S1.** Crystal data and structure refinement for **4a** and **4b**

| Identification code                | <b>4a</b>                                                        | <b>4b</b>                                                        |
|------------------------------------|------------------------------------------------------------------|------------------------------------------------------------------|
| Empirical formula                  | C <sub>54</sub> H <sub>54</sub> B <sub>30</sub>                  | C <sub>60</sub> H <sub>66</sub> B <sub>30</sub> O <sub>6</sub>   |
| Formula weight                     | 1026.30                                                          | 1207.42                                                          |
| Temperature/K                      | 296.15                                                           | 150.15                                                           |
| Crystal system                     | hexagonal                                                        | trigonal                                                         |
| Space group                        | P6 <sub>3</sub> /m                                               | R-3c                                                             |
| a/Å                                | 21.9777(18)                                                      | 29.4352(4)                                                       |
| b/Å                                | 21.9777(18)                                                      | 29.4352(4)                                                       |
| c/Å                                | 9.8702(15)                                                       | 19.3133(3)                                                       |
| α/°                                | 9.8702(15)                                                       | 19.3133(3)                                                       |
| β/°                                | 90                                                               | 90                                                               |
| γ/°                                | 120                                                              | 120                                                              |
| Volume/Å <sup>3</sup>              | 4128.8(9)                                                        | 14491.8(5)                                                       |
| Z                                  | 121                                                              | 6                                                                |
| ρ <sub>calc</sub> /cm <sup>3</sup> | 0.826                                                            | 0.830                                                            |
| μ/mm <sup>-1</sup>                 | 0.041                                                            | 0.352                                                            |
| F(000)                             | 1056.0                                                           | 3744.0                                                           |
| Crystal size/mm <sup>3</sup>       | 0.12 × 0.11 × 0.1                                                | 0.12 × 0.11 × 0.1                                                |
| Radiation                          | MoKα (λ = 0.71073)                                               | CuKα (λ = 1.54184)                                               |
| 2θ range for data collection/°     | 3.706 to 50.044                                                  | 9.794 to 145.396                                                 |
| Index ranges                       | 26 ≤ h ≤ 22,<br>-25 ≤ k ≤ 26,<br>-11 ≤ l ≤ 11                    | -36 ≤ h ≤ 35,<br>-36 ≤ k ≤ 33,<br>-23 ≤ l ≤ 19                   |
| Reflections collected              | 23943                                                            | 30382                                                            |
| Independent reflections            | 2587 [R <sub>int</sub> = 0.1362,<br>R <sub>sigma</sub> = 0.0736] | 3188 [R <sub>int</sub> = 0.1042,<br>R <sub>sigma</sub> = 0.0398] |
| Data/restraints/parameters         | 2587/0/145                                                       | 3188/0/146                                                       |
| Goodness-of-fit on F <sup>2</sup>  | 1.035                                                            | 1.084                                                            |
| Final R indexes [ >=2σ (I)]        | R <sub>1</sub> = 0.0797,<br>wR <sub>2</sub> = 0.2325             | R <sub>1</sub> = 0.0591,<br>wR <sub>2</sub> = 0.1681             |
| Final R indexes [all data]         | R <sub>1</sub> = 0.1190,<br>wR <sub>2</sub> = 0.2637             | R <sub>1</sub> = 0.0713,<br>wR <sub>2</sub> = 0.1787             |
| CCDC number                        | 2212259                                                          | 2204374                                                          |



---

## DFT Calculations

Density functional theory (DFT) calculations were performed using Gaussian 09(Revision C.01).<sup>3</sup> Geometry optimizations were performed with C3 symmetries limit, using Single-crystal as starting geometries. The calculations were performed using the functional B3LYP and the 6-31G(d) basis set. Each structure was optimized to meet standard convergence criteria, and the existence of a local minimum was verified by a normal mode frequency calculation. Negative frequencies were not observed.

## General results

| reference | SCF<br>E[hartree] | ZPV<br>E[hartree] | lowest<br>freq.[cm <sup>-1</sup> ] | H [hartree] | G<br>[hartree] | E <sub>HOMO</sub><br>[eV] | E <sub>LUMO</sub><br>[eV] |
|-----------|-------------------|-------------------|------------------------------------|-------------|----------------|---------------------------|---------------------------|
| 4a        | -2836.4005        | 1.0220            | 7.68                               | -2835.3144  | -2835.4805     | -6.38                     | -2.49                     |
| 4b        | -3523.5912        | 1.2198            | 7.77                               | -3522.2931  | -3522.4855     | -6.17                     | -2.17                     |

**Table S2.** From left to right: reference, SCF electronic energy, zero-point vibrational energy, lowest vibrational frequency, sum of electronic and thermal enthalpies, sum of electronic and free energies, energy of the HOMO orbital, energy of the LUMO orbital.

**Table S3** Atomic coordinates of **4a** after geometry optimization.

| Atom | X (Å)       | Y (Å)        | Z (Å)       |
|------|-------------|--------------|-------------|
| B    | -1.86501600 | -9.59207800  | -1.41508500 |
| B    | -2.21640700 | -11.31259100 | -1.43774100 |
| B    | -1.58221500 | -12.01544200 | 0.07513000  |
| B    | -0.68372500 | -10.73467900 | -0.75604100 |
| C    | -1.04818400 | -9.29335100  | 0.07568700  |
| B    | -2.09393500 | -9.54633300  | 1.41468200  |
| C    | -2.72474400 | -8.94606600  | -0.07519300 |
| B    | -3.49159400 | -10.15428300 | -1.01059000 |
| B    | -3.31554600 | -11.65621600 | -0.07752600 |
| B    | -2.45485900 | -11.26486500 | 1.43603400  |
| B    | -3.63188200 | -10.12502200 | 0.75497900  |
| B    | -0.82445100 | -10.70781600 | 1.00956300  |
| H    | -4.63352800 | -9.76788100  | 1.27304400  |
| H    | -4.38865100 | -9.80110600  | -1.69681200 |
| H    | -4.15040900 | -12.49722800 | -0.12913500 |
| H    | -2.66379000 | -11.80917700 | 2.46884100  |
| H    | -2.04288300 | -8.80903400  | 2.33077500  |
| H    | -1.61793700 | -8.89390100  | -2.32997900 |
| H    | -2.24072500 | -11.89464100 | -2.47084700 |
| H    | -1.14997800 | -13.11888800 | 0.12515700  |
| H    | 0.37732300  | -10.80485100 | -1.27412100 |
| H    | 0.13906900  | -10.74011100 | 1.69582400  |
| C    | -3.14120300 | -7.50475600  | -0.08618100 |
| C    | -0.09395900 | -8.13562200  | 0.08782000  |
| C    | -2.90652000 | -6.67708600  | -1.19183800 |
| C    | -3.29664000 | -5.34478700  | -1.17949300 |
| C    | -3.94143700 | -4.79825600  | -0.05440800 |
| C    | -4.18000700 | -5.63103400  | 1.05586500  |
| C    | -3.78352900 | -6.96043800  | 1.03565300  |
| C    | 0.71211800  | -7.89151300  | -1.03369800 |
| C    | 1.60381800  | -6.82878600  | -1.05421000 |
| C    | 1.71472500  | -5.96898000  | 0.05536500  |
| C    | 0.90534700  | -6.21395300  | 1.18034700  |
| C    | 0.01854600  | -7.28205800  | 1.19308700  |
| C    | -4.35436800 | -3.44127800  | -0.04169300 |

|   |              |             |             |
|---|--------------|-------------|-------------|
| C | 2.63186800   | -4.88692600 | 0.04214900  |
| C | -4.72749700  | -2.27933200 | -0.02856200 |
| C | 3.43540700   | -3.96840900 | 0.02771100  |
| B | -7.37353100  | 6.42216600  | -1.40942100 |
| B | -8.68693400  | 7.58765700  | -1.42455700 |
| B | -9.61486800  | 7.37850400  | 0.08556800  |
| B | -8.95443600  | 5.96633900  | -0.75526900 |
| C | -7.52506300  | 5.55419600  | 0.07479800  |
| B | -7.22243900  | 6.57578100  | 1.42214500  |
| C | -6.38560100  | 6.83260600  | -0.06516300 |
| B | -7.04675600  | 8.10841200  | -0.99146400 |
| B | -8.43625000  | 8.70076500  | -0.05536600 |
| B | -8.52999400  | 7.74782000  | 1.45067900  |
| B | -6.95339900  | 8.20172000  | 0.77505600  |
| B | -8.86310400  | 6.06078900  | 1.01108300  |
| H | -6.14396200  | 8.88681900  | 1.29911800  |
| H | -6.29081000  | 8.71353900  | -1.67170000 |
| H | -8.74630700  | 9.84487100  | -0.09819700 |
| H | -8.89793900  | 8.19331300  | 2.48644800  |
| H | -6.60972700  | 6.15599600  | 2.33508600  |
| H | -6.89164900  | 5.86560900  | -2.32773800 |
| H | -9.17746000  | 7.90764200  | -2.45589000 |
| H | -10.78659700 | 7.55595500  | 0.13537900  |
| H | -9.54589100  | 5.08695700  | -1.28066200 |
| H | -9.37389500  | 5.23724500  | 1.69020800  |
| C | -4.92915700  | 6.47238400  | -0.07657900 |
| C | -7.00026700  | 4.14860100  | 0.07643600  |
| C | -4.32825600  | 5.85791100  | -1.18300800 |
| C | -2.97946800  | 5.52912500  | -1.16935200 |
| C | -2.18522300  | 5.81123700  | -0.04232600 |
| C | -2.78872900  | 6.43130500  | 1.06861500  |
| C | -4.13811500  | 6.75310900  | 1.04710400  |
| C | -7.19781000  | 3.33453700  | -1.04842500 |
| C | -6.72270900  | 2.03130500  | -1.07860400 |
| C | -6.02690800  | 1.49975000  | 0.02427100  |
| C | -5.82768500  | 2.31751200  | 1.15209300  |
| C | -6.30988200  | 3.61914800  | 1.17451200  |

|   |             |             |             |
|---|-------------|-------------|-------------|
| C | -0.80361500 | 5.49021200  | -0.02875400 |
| C | -5.54910100 | 0.16434100  | 0.00288600  |
| C | 0.38912200  | 5.23178800  | -0.01554200 |
| C | -5.15500600 | -0.99062500 | -0.01294400 |
| B | 9.24380100  | 3.16801200  | -1.41829700 |
| B | 10.90913600 | 3.72364900  | -1.44195600 |
| B | 11.19679400 | 4.63867100  | 0.06325100  |
| B | 9.64064100  | 4.76844600  | -0.77328200 |
| C | 8.57249700  | 3.74001000  | 0.06523900  |
| B | 9.31084000  | 2.97319200  | 1.41338600  |
| C | 9.11039200  | 2.11332400  | -0.06891600 |
| B | 10.54249400 | 2.04427100  | -0.99975700 |
| B | 11.75314800 | 2.95655400  | -0.07228700 |
| B | 10.97948200 | 3.52061100  | 1.43396900  |
| B | 10.58309000 | 1.92482400  | 0.76695800  |
| B | 9.68288200  | 4.64981200  | 0.99386100  |
| H | 10.77375100 | 0.88376400  | 1.29519700  |
| H | 10.68665100 | 1.08431800  | -1.67657600 |
| H | 12.89907300 | 2.65371100  | -0.11796900 |
| H | 11.55260700 | 3.62155600  | 2.46742800  |
| H | 8.64453400  | 2.65619400  | 2.33047900  |
| H | 8.51862100  | 3.02417900  | -2.33402300 |
| H | 11.42786400 | 3.98393000  | -2.47629400 |
| H | 11.93602700 | 5.56529300  | 0.10666900  |
| H | 9.17180500  | 5.71729800  | -1.30163800 |
| H | 9.22699400  | 5.50657100  | 1.67095900  |
| C | 8.07059800  | 1.03177400  | -0.07219300 |
| C | 7.09290400  | 3.98764700  | 0.07140200  |
| C | 7.23665800  | 0.81189700  | -1.17624500 |
| C | 6.27799400  | -0.19208000 | -1.15535600 |
| C | 6.12726700  | -1.01467000 | -0.02342400 |
| C | 6.96751700  | -0.79545000 | 1.08504400  |
| C | 7.92017200  | 0.21279900  | 1.05643800  |
| C | 6.48044000  | 4.55157100  | -1.05734100 |
| C | 5.11415200  | 4.79152900  | -1.08314500 |
| C | 4.31212700  | 4.46952800  | 0.02851400  |
| C | 4.92714900  | 3.90360300  | 1.16088800  |

|   |             |             |             |
|---|-------------|-------------|-------------|
| C | 6.29556800  | 3.67023700  | 1.17876100  |
| C | 5.15902400  | -2.05114100 | -0.00348300 |
| C | 2.91645400  | 4.72229900  | 0.01127500  |
| C | 4.33863500  | -2.95461500 | 0.01230600  |
| C | 1.71887300  | 4.95725300  | -0.00219100 |
| H | -2.41529500 | -7.07153000 | -2.07077400 |
| H | -3.10805900 | -4.71511200 | -2.04218500 |
| H | -4.68088100 | -5.22439500 | 1.92772200  |
| H | -3.98229400 | -7.58462800 | 1.89805000  |
| H | 0.64667100  | -8.54343900 | -1.89596600 |
| H | 2.22505900  | -6.65474900 | -1.92606300 |
| H | 0.98148900  | -5.56016600 | 2.04234600  |
| H | -0.58928100 | -7.44838200 | 2.07190800  |
| H | -4.91363400 | 5.63207400  | -2.06382000 |
| H | -2.52729400 | 5.05289200  | -2.03250500 |
| H | -2.18751300 | 6.65915500  | 1.94211000  |
| H | -4.58055700 | 7.23454700  | 1.91043500  |
| H | -7.73471600 | 3.72163300  | -1.90564800 |
| H | -6.88750700 | 1.41080900  | -1.95277300 |
| H | -5.29422300 | 1.92052000  | 2.00889500  |
| H | -6.14414200 | 4.22428000  | 2.05524000  |
| H | 7.33204800  | 1.42713900  | -2.06050100 |
| H | 5.63824500  | -0.35083000 | -2.01664200 |
| H | 6.86591600  | -1.42514200 | 1.96226800  |
| H | 8.55976400  | 0.36059300  | 1.91777400  |
| H | 7.07917900  | 4.81241100  | -1.92124800 |
| H | 4.65442500  | 5.23325600  | -1.96057900 |
| H | 4.32145200  | 3.65245300  | 2.02479600  |
| H | 6.74199400  | 3.23736000  | 2.06358700  |

**Table S4** Atomic coordinates of **4b** after geometry optimization.

| Atom | X (Å)      | Y (Å)      | Z (Å)       |
|------|------------|------------|-------------|
| O    | 1.18376900 | 4.72478600 | -1.88191000 |
| C    | 3.90811900 | 8.46645000 | -0.13721200 |
| C    | 2.64550100 | 7.65373600 | -0.17883300 |
| C    | 2.49246400 | 6.60986200 | -1.09883800 |
| H    | 3.27484800 | 6.41152100 | -1.81404500 |

|   |              |             |             |
|---|--------------|-------------|-------------|
| C | 1.36836800   | 5.78556300  | -1.06447000 |
| C | 0.33770300   | 6.03137800  | -0.12184900 |
| C | 1.64188400   | 7.88744700  | 0.76799200  |
| H | 1.74997800   | 8.68241500  | 1.49382000  |
| C | -1.87033000  | 4.59641100  | -0.02869900 |
| C | -0.82966900  | 5.23130300  | -0.08928700 |
| C | 0.50082100   | 7.09544200  | 0.78117000  |
| H | -0.28535700  | 7.28448400  | 1.50419800  |
| B | 3.97139800   | 9.97731100  | 0.64746000  |
| H | 2.96683900   | 10.41194900 | 1.09313900  |
| B | 5.94070300   | 9.84993700  | -1.42790600 |
| H | 6.37360700   | 10.26455400 | -2.45135500 |
| C | 2.25756300   | 4.33484700  | -2.73251900 |
| H | 1.92013100   | 3.42631600  | -3.23182800 |
| H | 3.16346300   | 4.12286400  | -2.15213400 |
| H | 2.47200200   | 5.10598100  | -3.48275400 |
| B | 5.05656800   | 8.33132700  | -1.40894200 |
| H | 4.82788300   | 7.60999800  | -2.31196900 |
| B | 4.19633800   | 9.84697500  | -1.10476100 |
| H | 3.33286400   | 10.15805300 | -1.85162900 |
| B | 5.27136800   | 10.88207200 | -0.13914100 |
| H | 5.21107000   | 12.06300000 | -0.23283000 |
| O | -4.68491100  | 1.33826400  | 1.88484000  |
| C | -9.28557100  | 0.84906900  | 0.13460600  |
| C | -7.95031500  | 1.53603300  | 0.17769300  |
| C | -6.97069900  | 1.14648600  | 1.09866100  |
| H | -7.19074800  | 0.36950100  | 1.81339000  |
| C | -5.69490300  | 1.70821200  | 1.06594900  |
| C | -5.39150300  | 2.72378300  | 0.12366300  |
| C | -7.64986700  | 2.52193700  | -0.76885800 |
| H | -8.39144200  | 2.82544300  | -1.49577900 |
| C | -3.04464100  | 3.91849200  | 0.03357400  |
| C | -4.11499800  | 3.33493700  | 0.09299000  |
| C | -6.39344000  | 3.11415400  | -0.78071500 |
| H | -6.16325600  | 3.88929300  | -1.50373700 |
| B | -10.62500900 | 1.55103200  | -0.65066100 |
| H | -10.49791800 | 2.63838200  | -1.09585400 |

|   |              |             |             |
|---|--------------|-------------|-------------|
| B | -11.50164000 | -0.21730800 | 1.42433800  |
| H | -12.07816300 | -0.38488900 | 2.44720700  |
| C | -4.88489900  | 0.21397700  | 2.73609700  |
| H | -3.92981000  | 0.05231400  | 3.23636400  |
| H | -5.15375200  | -0.67705800 | 2.15631100  |
| H | -5.66059400  | 0.41449200  | 3.48549400  |
| B | -9.74469600  | -0.21213800 | 1.40662200  |
| H | -9.00569200  | -0.37596900 | 2.30941100  |
| B | -10.62557200 | 1.29112100  | 1.10141300  |
| H | -10.46250500 | 2.19406000  | 1.84860200  |
| B | -12.05950000 | 0.87863800  | 0.13513200  |
| H | -13.05146500 | 1.52234700  | 0.22807600  |
| O | 3.50142600   | 3.38812000  | 1.88484000  |
| C | 5.37810100   | 7.61700600  | 0.13460600  |
| C | 5.30540100   | 6.11715900  | 0.17769300  |
| C | 4.47823500   | 5.46356000  | 1.09866100  |
| H | 3.91537100   | 6.04262000  | 1.81339000  |
| C | 4.32680700   | 4.07782500  | 1.06594900  |
| C | 5.05461700   | 3.30728800  | 0.12366300  |
| C | 6.00899500   | 5.36401000  | -0.76885800 |
| H | 6.64262600   | 5.85448000  | -1.49577900 |
| C | 4.91583500   | 0.67749100  | 0.03357400  |
| C | 4.94563900   | 1.89622400  | 0.09299000  |
| C | 5.89365600   | 3.97980400  | -0.78071500 |
| H | 6.44985400   | 3.39289000  | -1.50373700 |
| B | 6.65573800   | 8.42601200  | -0.65066100 |
| H | 7.53386500   | 7.77227300  | -1.09585400 |
| B | 5.56262600   | 10.06936700 | 1.42433800  |
| H | 5.70575800   | 10.65244000 | 2.44720700  |
| C | 2.62775900   | 4.12345800  | 2.73609700  |
| H | 2.01021000   | 3.37715800  | 3.23636400  |
| H | 1.99052600   | 4.80180900  | 2.15631100  |
| H | 3.18925700   | 4.69497200  | 3.48549400  |
| B | 4.68863100   | 8.54522300  | 1.40662200  |
| H | 4.17724700   | 7.98714300  | 2.30941100  |
| B | 6.43093000   | 8.55645400  | 1.10141300  |
| H | 7.13136400   | 7.96376500  | 1.84860200  |

|   |              |             |             |
|---|--------------|-------------|-------------|
| B | 6.79067300   | 10.00451400 | 0.13513200  |
| H | 7.84412400   | 10.54172700 | 0.22807600  |
| O | -4.68366900  | -1.33721900 | -1.88191000 |
| C | -9.28622000  | -0.84869500 | -0.13721200 |
| C | -7.95108000  | -1.53579700 | -0.17883300 |
| C | -6.97054100  | -1.14639400 | -1.09883800 |
| H | -7.18996400  | -0.36965900 | -1.81404500 |
| C | -5.69462900  | -1.70773900 | -1.06447000 |
| C | -5.39217800  | -2.72323000 | -0.12184900 |
| C | -7.65167200  | -2.52181000 | 0.76799200  |
| H | -8.39418100  | -2.82568200 | 1.49382000  |
| C | -3.04544400  | -3.91795800 | -0.02869900 |
| C | -4.11560700  | -3.33416600 | -0.08928700 |
| C | -6.39524300  | -3.11399700 | 0.78117000  |
| H | -6.16587000  | -3.88936900 | 1.50419800  |
| B | -10.62630300 | -1.54932400 | 0.64746000  |
| H | -10.50043200 | -2.63661700 | 1.09313900  |
| B | -11.50064700 | 0.21983100  | -1.42790600 |
| H | -12.07616800 | 0.38742900  | -2.45135500 |
| C | -4.88286900  | -0.21231700 | -2.73251900 |
| H | -3.92734200  | -0.05027500 | -3.23182800 |
| H | -5.15223600  | 0.67820700  | -2.15213400 |
| H | -5.65791000  | -0.41217400 | -3.48275400 |
| B | -9.74342400  | 0.21345300  | -1.40894200 |
| H | -9.00439300  | 0.37607000  | -2.31196900 |
| B | -10.62589900 | -1.28935200 | -1.10476100 |
| H | -10.46356400 | -2.19268100 | -1.85162900 |
| B | -12.05983500 | -0.87589700 | -0.13914100 |
| H | -13.05240000 | -1.51858100 | -0.23283000 |
| O | 3.49990000   | -3.38756700 | -1.88191000 |
| C | 5.37810100   | -7.61775500 | -0.13721200 |
| C | 5.30557900   | -6.11793900 | -0.17883300 |
| C | 4.47807700   | -5.46346900 | -1.09883800 |
| H | 3.91511600   | -6.04186200 | -1.81404500 |
| C | 4.32626000   | -4.07782300 | -1.06447000 |
| C | 5.05447500   | -3.30814800 | -0.12184900 |
| C | 6.00978800   | -5.36563700 | 0.76799200  |



|   |             |              |             |
|---|-------------|--------------|-------------|
| H | 6.64420300  | -5.85673300  | 1.49382000  |
| C | 4.91577300  | -0.67845200  | -0.02869900 |
| C | 4.94527500  | -1.89713700  | -0.08928700 |
| C | 5.89442200  | -3.98144500  | 0.78117000  |
| H | 6.45122700  | -3.39511500  | 1.50419800  |
| B | 6.65490500  | -8.42798700  | 0.64746000  |
| H | 7.53359300  | -7.77533200  | 1.09313900  |
| B | 5.55994400  | -10.06976800 | -1.42790600 |
| H | 5.70256100  | -10.65198200 | -2.45135500 |
| C | 2.62530600  | -4.12253000  | -2.73251900 |
| H | 2.00721100  | -3.37604100  | -3.23182800 |
| H | 1.98877400  | -4.80107100  | -2.15213400 |
| H | 3.18590900  | -4.69380700  | -3.48275400 |
| B | 4.68685600  | -8.54478000  | -1.40894200 |
| H | 4.17651000  | -7.98606800  | -2.31196900 |
| B | 6.42956100  | -8.55762300  | -1.10476100 |
| H | 7.13070000  | -7.96537200  | -1.85162900 |
| B | 6.78846600  | -10.00617500 | -0.13914100 |
| H | 7.84132900  | -10.54441900 | -0.23283000 |
| O | 1.18348500  | -4.72638400  | 1.88484000  |
| C | 3.90747000  | -8.46607500  | 0.13460600  |
| C | 2.64491400  | -7.65319100  | 0.17769300  |
| C | 2.49246400  | -6.61004500  | 1.09866100  |
| H | 3.27537700  | -6.41212100  | 1.81339000  |
| C | 1.36809700  | -5.78603700  | 1.06594900  |
| C | 0.33688700  | -6.03107000  | 0.12366300  |
| C | 1.64087200  | -7.88594800  | -0.76885800 |
| H | 1.74881500  | -8.67992300  | -1.49577900 |
| C | -1.87119300 | -4.59598300  | 0.03357400  |
| C | -0.83064100 | -5.23116100  | 0.09299000  |
| C | 0.49978300  | -7.09395800  | -0.78071500 |
| H | -0.28659800 | -7.28218200  | -1.50373700 |
| B | 3.96927100  | -9.97704400  | -0.65066100 |
| H | 2.96405300  | -10.41065500 | -1.09585400 |
| B | 5.93901500  | -9.85205900  | 1.42433800  |
| H | 6.37240500  | -10.26755200 | 2.44720700  |
| C | 2.25714000  | -4.33743500  | 2.73609700  |

---

|   |            |              |            |
|---|------------|--------------|------------|
| H | 1.91960000 | -3.42947200  | 3.23636400 |
| H | 3.16322500 | -4.12475100  | 2.15631100 |
| H | 2.47133700 | -5.10946400  | 3.48549400 |
| B | 5.05606400 | -8.33308500  | 1.40662200 |
| H | 4.82844500 | -7.61117400  | 2.30941100 |
| B | 4.19464200 | -9.84757600  | 1.10141300 |
| H | 3.33114100 | -10.15782500 | 1.84860200 |
| B | 5.26882700 | -10.88315200 | 0.13513200 |
| H | 5.20734100 | -12.06407400 | 0.22807600 |

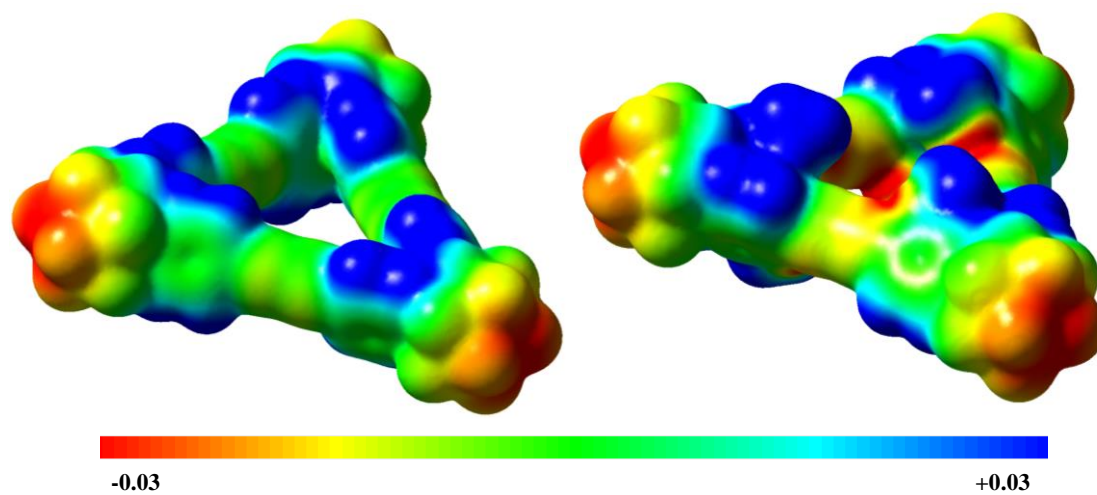

**Figure S1** Electrostatic potential maps of **4a**(left) and **4b**(right).

## 4. Fluorescence Properties

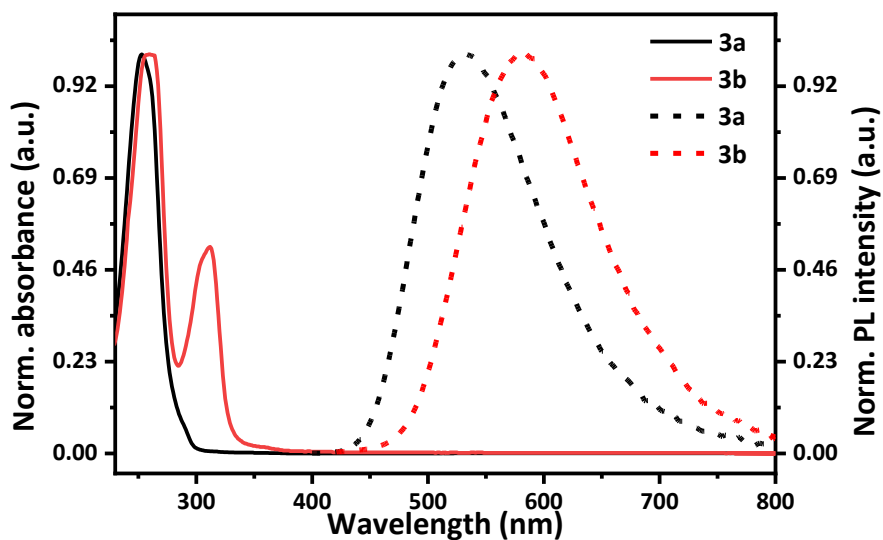

**Figure S2** UV-vis absorption spectra of **3a** and **3b** in THF ( $1.0 \times 10^{-5}$  M). Photoluminescence spectra of **3a** and **3b** in solid state. Excitation wavelength: 374 nm and 336 nm.

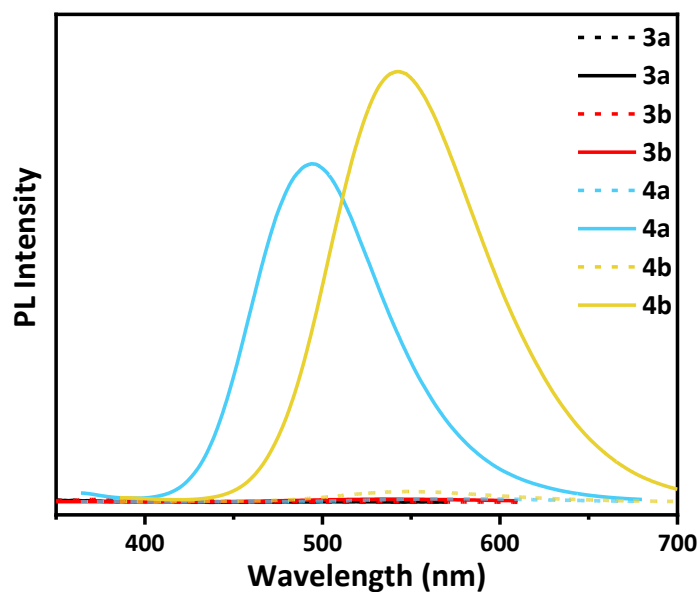

**Figure S3.** Fluorescence spectra of **3a**, **3b**, **4a** and **4b** in THF ( $1 \times 10^{-5}$  mol/L, dashed line) and mixed solvent of THF/H<sub>2</sub>O) 1/99 (v/v) ( $1 \times 10^{-5}$  mol/L, solid line).

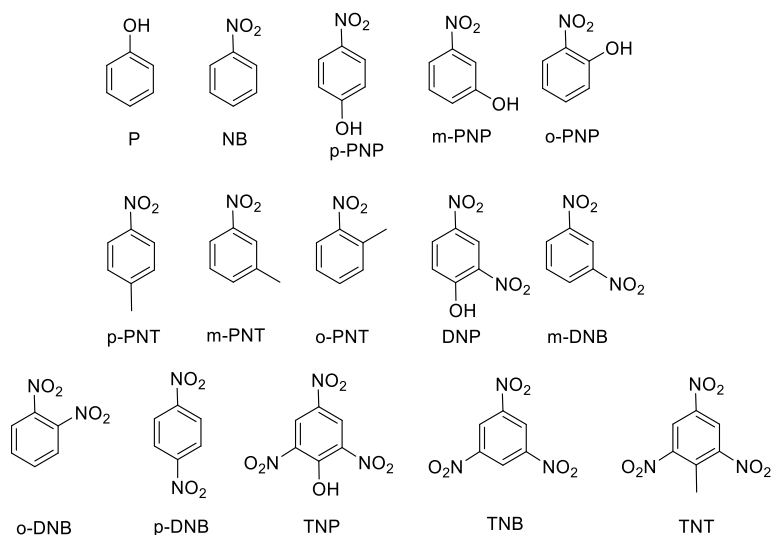

**Figure S4** Structure and the abbreviation of guests

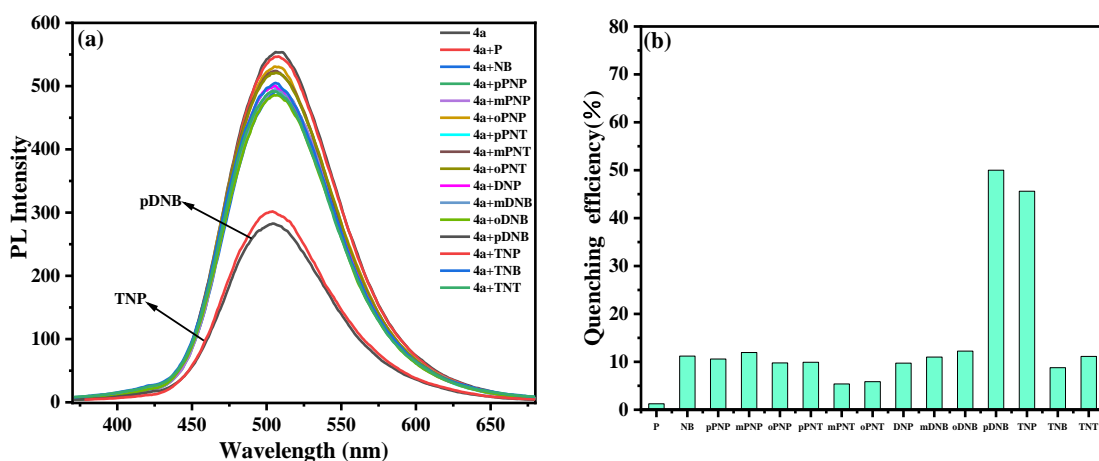

**Figure S5** (a) Fluorescence spectra of 2  $\mu\text{M}$  **4a** in 95:5  $\text{H}_2\text{O}/\text{THF}$  by addition 10eq of different nitroaromatic compounds. Excitation at 354 nm. (b) Fluorescence quenching efficiencies ( $(1-I/I_0) \times 100\%$ ), where  $I$  and  $I_0$  denote the fluorescence intensity of **4a** with and without analyte, respectively) of different analytes.

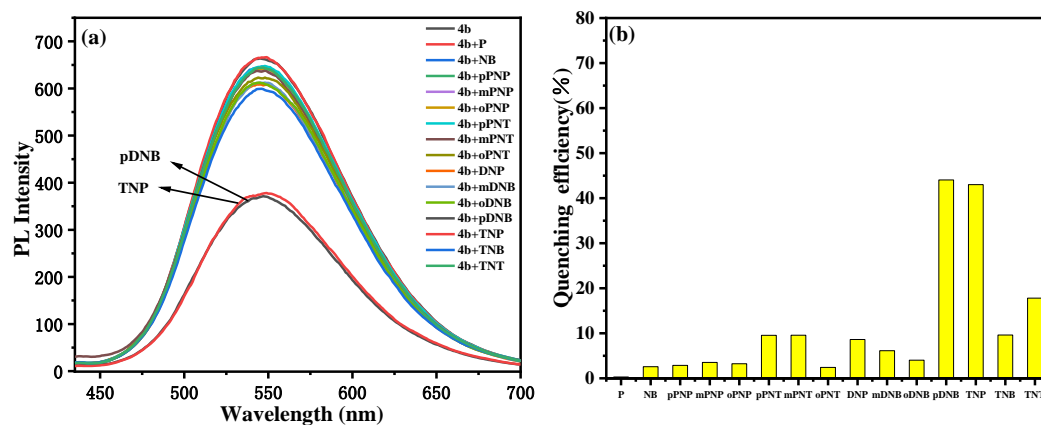

**Figure S6** (a) Fluorescence spectra of 2  $\mu$ M **4b** in 95:5 H<sub>2</sub>O/THF by addition 10eq of different nitroaromatic compounds. Excitation at 376 nm. (b) Fluorescence quenching efficiencies ( $(1-I/I_0) \times 100\%$ ), where  $I$  and  $I_0$  denote the fluorescence intensity of **4b** with and without analyte, respectively) of different analytes.

---

The fluorescent titration experiments of **4a** for different quenchers.

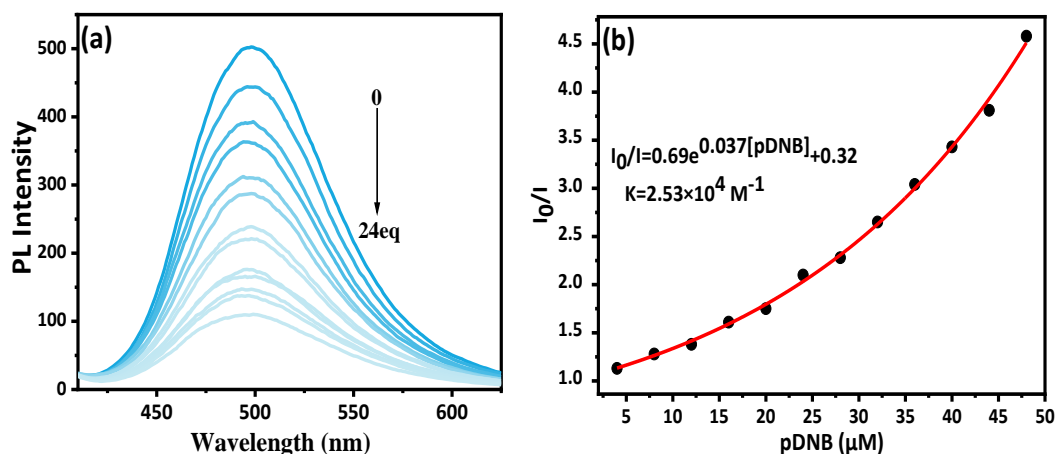

**Figure S7** (a) Emission spectra ( $\lambda_{\text{ex}} = 354 \text{ nm}$ ) of **4a** ( $2.0 \times 10^{-6} \text{ M}$ ) in presence of p-DNB at various concentrations (from 0 to 24 equiv.). Solvent (95:5  $\text{H}_2\text{O}/\text{THF}$ ). (b) The nonlinear curve-fitting for the quenching constant of **4a** with p-DNB.

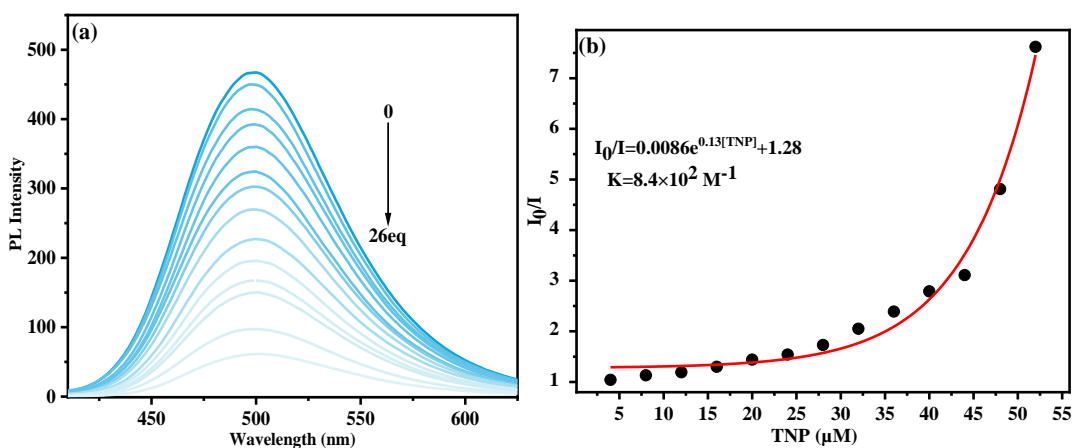

**Figure S8** (a) Emission spectra ( $\lambda_{\text{ex}} = 354 \text{ nm}$ ) of **4a** ( $2.0 \times 10^{-6} \text{ M}$ ) in presence of TNP at various concentrations (from 0 to 26 equiv.). Solvent (95:5  $\text{H}_2\text{O}/\text{THF}$ ) (b) The nonlinear curve-fitting for the quenching constant of **4a** with TNP.

The fluorescent titration experiments of **4b** for different quenchers.

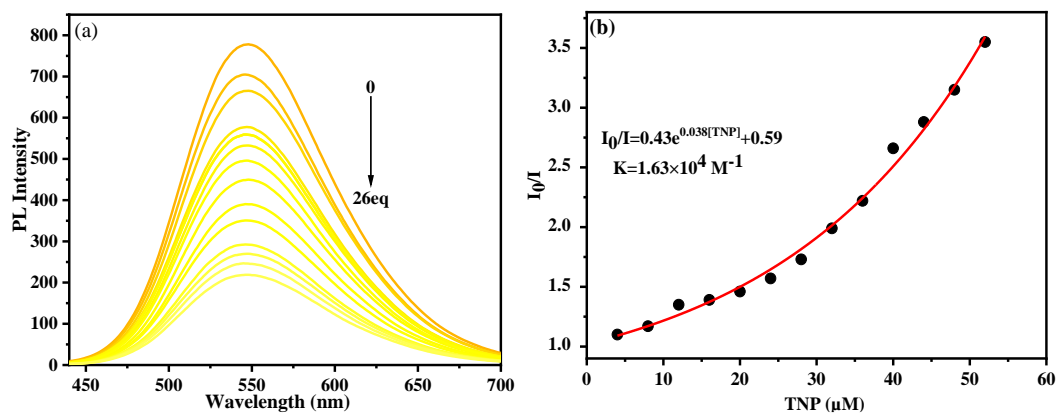

**Figure S9** Emission spectra ( $\lambda_{\text{ex}} = 376 \text{ nm}$ ) of **4b** ( $2.0 \times 10^{-6} \text{ M}$ ) in presence of p-TNP at various concentrations (from 0 to 26 equiv.). Solvent (95:5  $\text{H}_2\text{O}/\text{THF}$ )  
(b) The nonlinear curve-fitting for the quenching constant of **4b** with TNP.

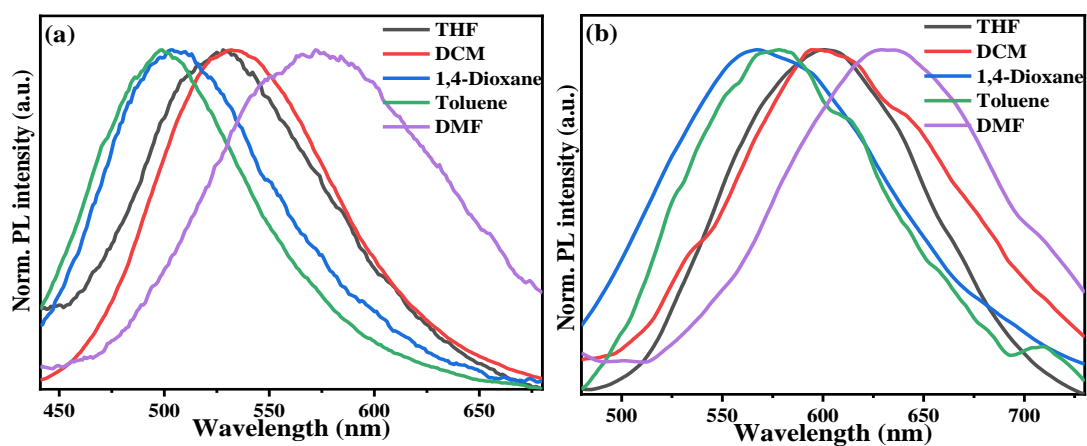

**Figure S10** PL spectra of **4a** and **4b** in various solvents under excitation at 354 nm and 376 nm, respectively.

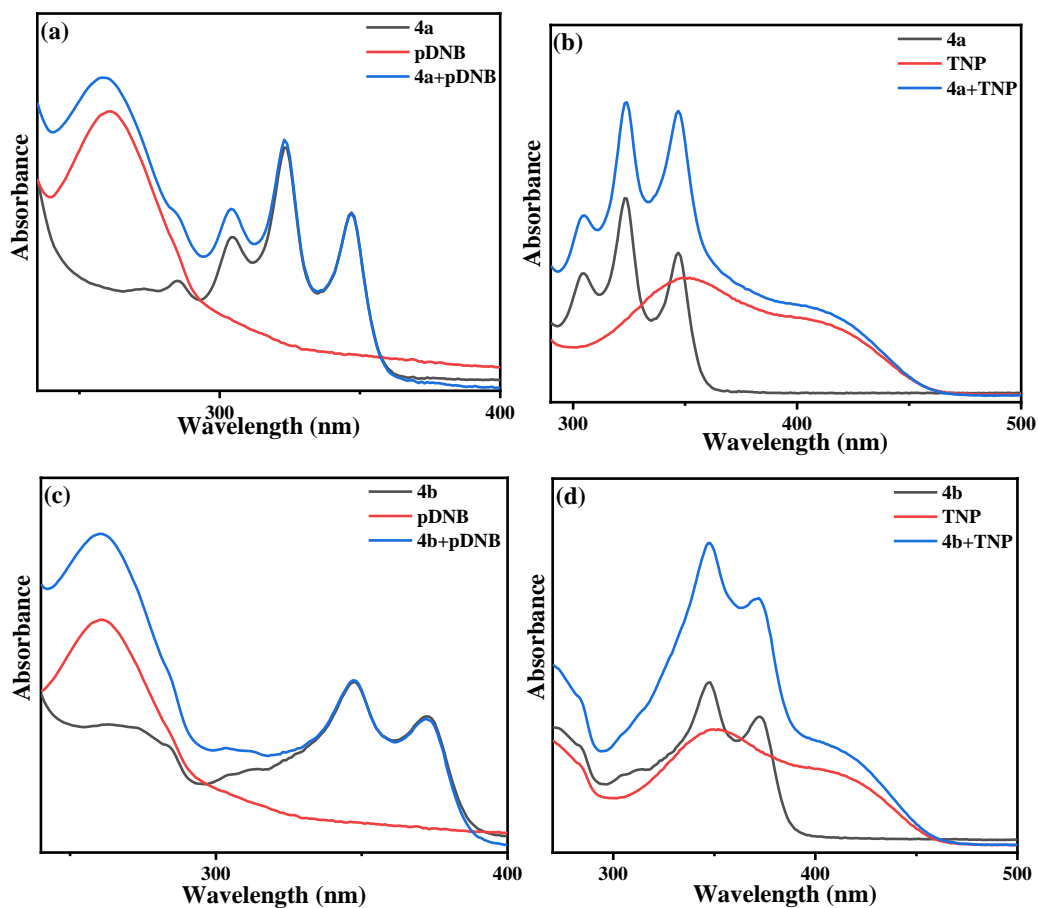

**Figure S11.** UV/Vis spectra of **4a**, **4b**, TNP, pDNB, and mixtures thereof in H<sub>2</sub>O/THF (95:5) ( $[4a] = [4b] = 1 \times 10^{-6}$  M,  $[TNP] = [pDNB] = 1 \times 10^{-5}$  M).



---

### Quantum yields determination:

Absolute quantum yields of all compounds in THF/water or in solid state were measured by employing an integrating sphere. The Principle of Absolute Quantum Yield Measurements. The absolute fluorescence quantum yield,  $\eta$ , is, by definition, the ratio of the number of photons emitted to the number of photons absorbed:

$$\eta = \frac{N^{\text{em}}}{N^{\text{abs}}} \dots\dots\dots(1)$$

There are two different methods for the measurement of the absolute fluorescence quantum yield: “Direct Excitation” measurements and “Direct & Indirect Excitation” measurements. With “Direct Excitation” measurements one records the scatter and the emission of the sample being directly excited by the radiation from the excitation monochromator only, whereas with “Direct and Indirect Excitation” one also records the emission of the sample while it is in a position where it is only indirectly excited by excitation radiation bouncing within the sphere.

#### “Direct Excitation” Method

This method only requires two experimental setups, see Figure S12. Note that with the “Direct Excitation” method the emission measurement actually contains the information of both direct and indirect excitation, as photons that pass the sample in the direct excitation beam may still be absorbed after scattering in the sphere.

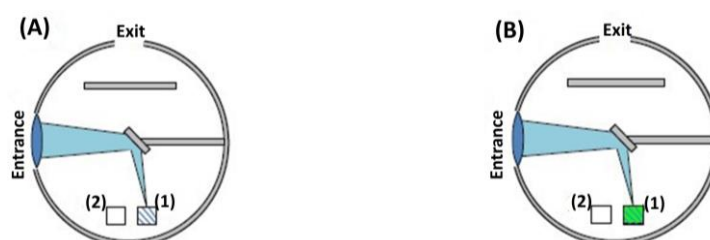

**Figure S12.** Two different measurement configurations required for Direct Excitation measurements:(A) reference sample (solvent only) in sample

position (1); (B) test sample in position 1 (position 2 remains empty for both measurements.)

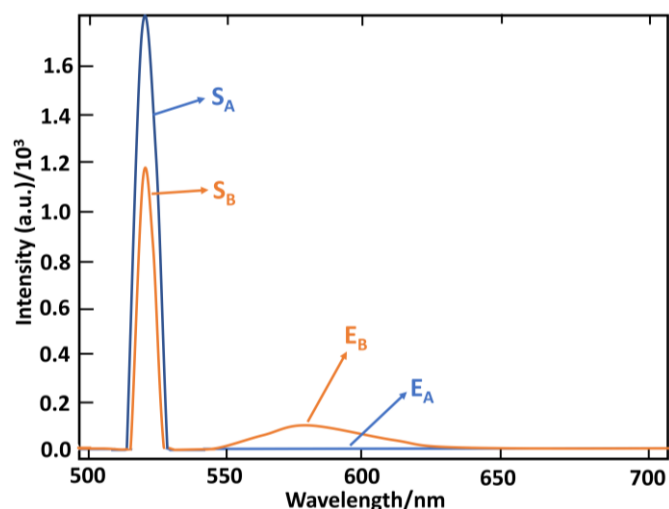

**Figure S13.** Spectral scans of the excitation scatter region or S-region (peaks on the left) and the emission region (E-region) of the sample and the solvent. The indices “A” and “B” refer to the experimental setup illustrated in Figure S12. Note that the quantities  $S_A$ ,  $S_B$ ,  $E_A$ , and  $E_B$  refer to the integral of the scans.

The absolute fluorescence quantum yield, calculated with the “Direct Excitation” method is calculated as follows:

$$\eta_{DExc} = \frac{E_B - E_A}{S_A - S_B} \dots\dots\dots(2)$$

$E_A(\lambda)$  and  $S_A(\lambda)$ , as well as  $E_B(\lambda)$  and  $S_B(\lambda)$  may be measured in four individual scans. However, it is often convenient to measure these spectra in two scans only. For the calculation of the integrals, the selection of the integral regions, and the final calculation of  $\eta_{DExc}$  use the quantum yield wizard that is supplied with the FLS980 software.

If the sphere background,  $E_A(\lambda)$ , is sufficiently low the measurement of this region may be omitted to save measurement time. In this case the equation degrades to:

$$\eta_{DExc} = \frac{E_B}{S_A - S_B} \dots\dots\dots(3)$$

**The fluorescence quantum yield data**

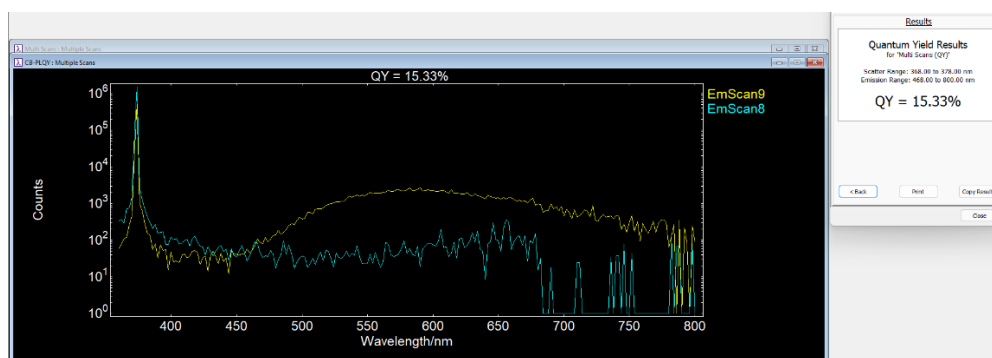

**Figure S14** The fluorescence quantum yield data of **3a** in the powder state.

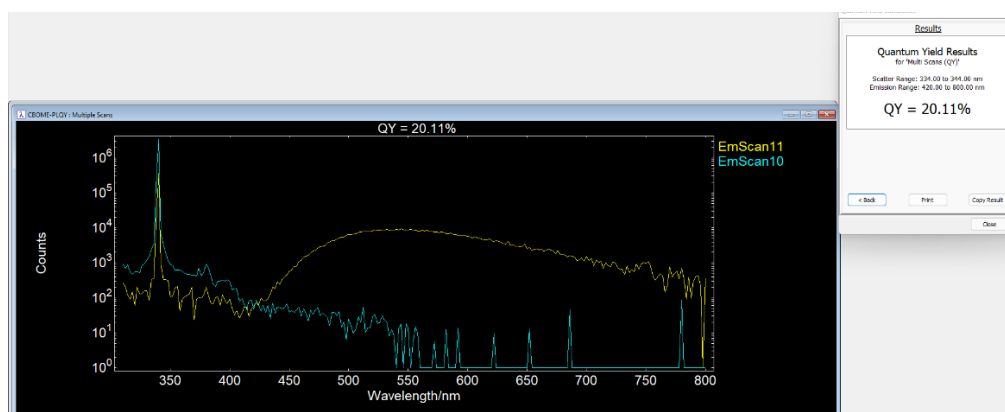

**Figure S15** The fluorescence quantum yield data of **3b** in the powder state.

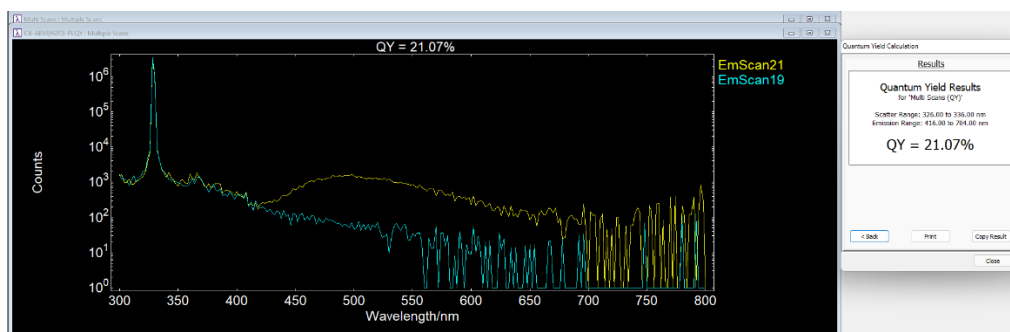

**Figure S16** The fluorescence quantum yield data of **4a** in aggregation state,  $f_w = 99\%$  ( $1.0 \times 10^{-5}$  M) Water faction in THF solvent.

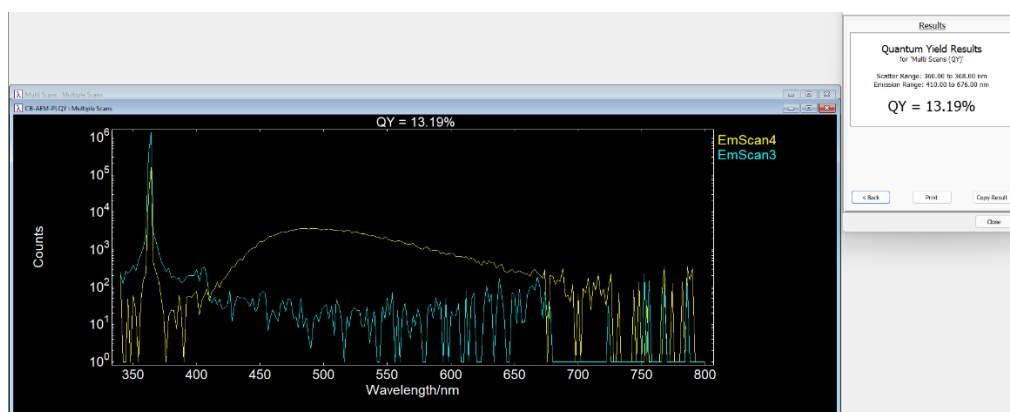

**Figure S17** The fluorescence quantum yield data of **4a** in the powder state.

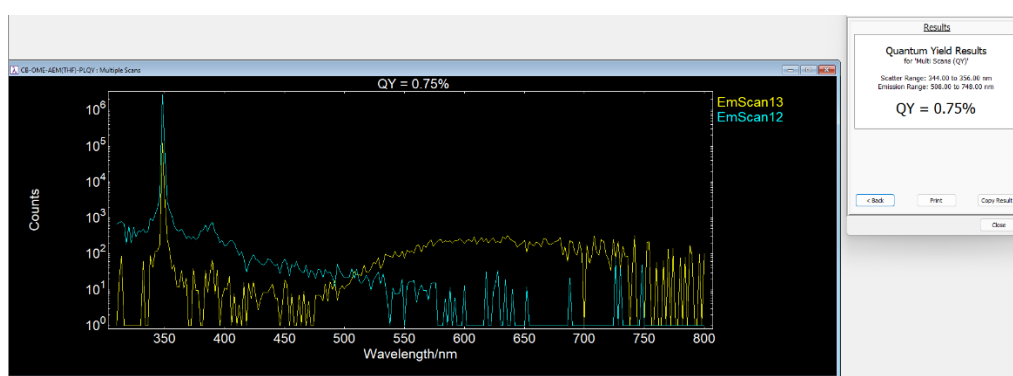

**Figure S18** The fluorescence quantum yield data of **4b** in THF( $1.0 \times 10^{-5}$  M).

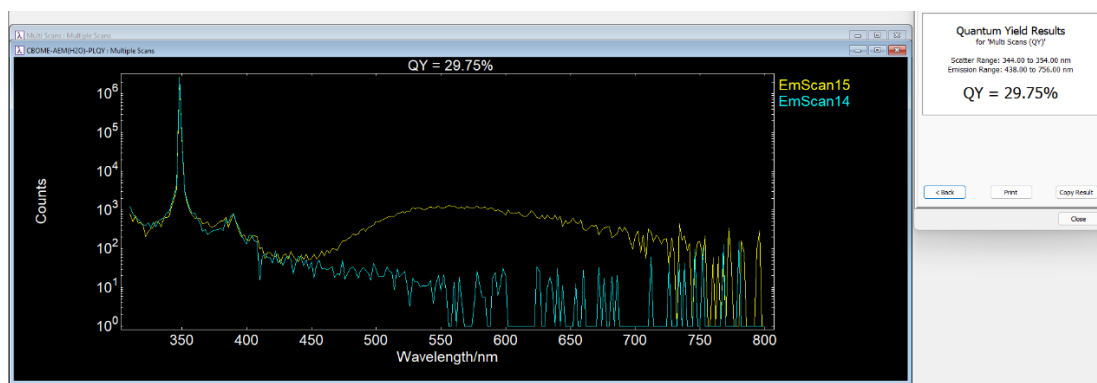

**Figure S19** The fluorescence quantum yield data of **4b** in aggregation state,  $f_w = 99\%$ ( $1.0 \times 10^{-5}$  M) Water fraction in THF solvent.

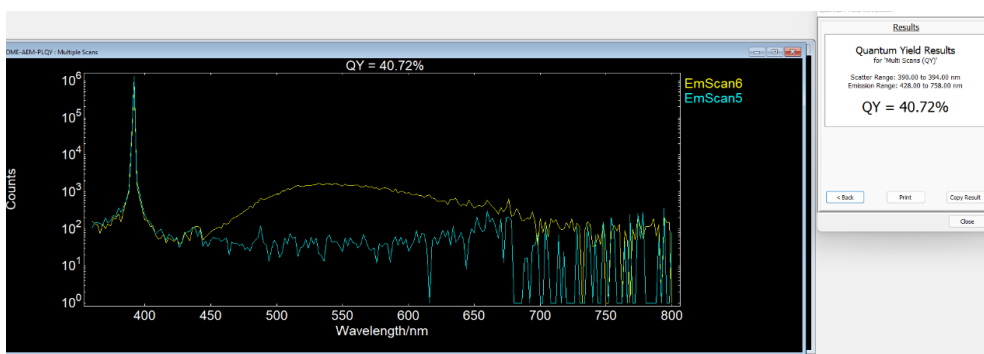

**Figure S20** The fluorescence quantum yield data of **4b** in the powder state.

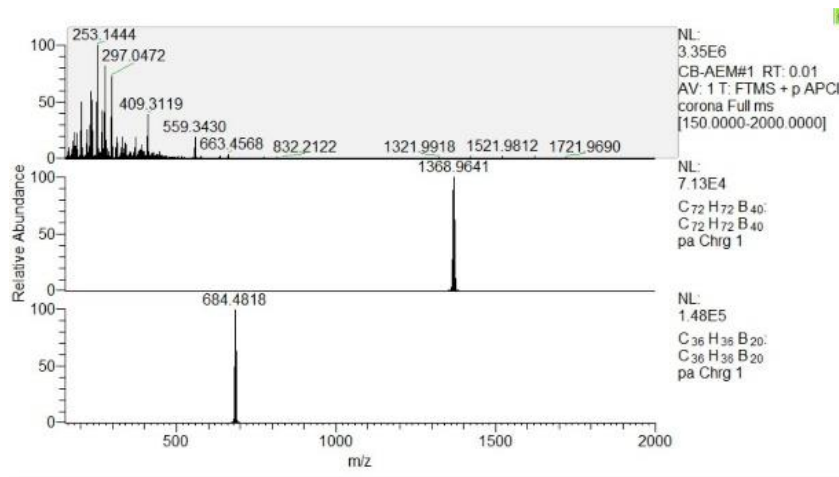

**Figure S21** HRMS spectrum of **4a**. There didn't find the peaks of other dimers/tetramers in the final HRMS mass spectra.

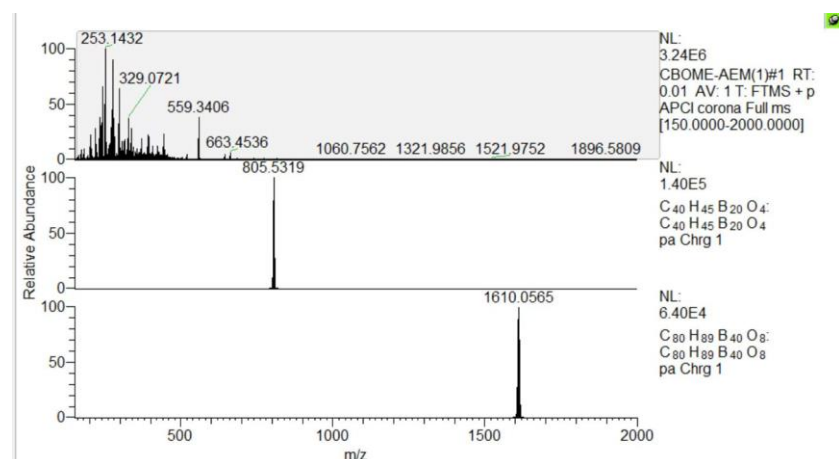

**Figure S22** HRMS spectrum of **4b**. There didn't find the peaks of other dimers/tetramers in the final HRMS mass spectra.

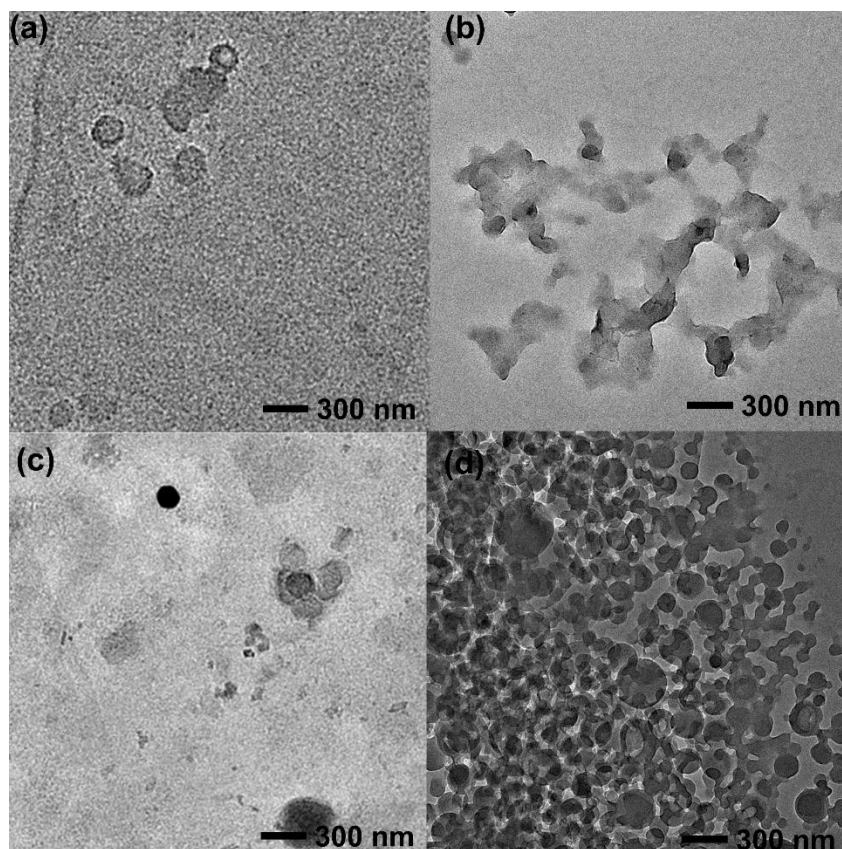

**Figure S23** Transmission electron microscopic images of (a)-(b)**4a** and (c)-(d)**4b** aggregates under different water fractions(0, 99%).

---

## References

1. O. V. Dolomanov, L. J. Bourhis, R. J. Gildea, J. A. K. Howard and H. Puschmann, OLEX2: a complete structure solution, refinement and analysis program, *J. Appl. Cryst.*, 2009, 42, 339-341.
2. G. M. Sheldrick, Crystal structure refinement with SHELXL, *Acta CrystallogrC Struct Chem*, 2015, 71, 3-8.
3. Gaussian 09, Revision C.01, M. J. Frisch, G. W. Trucks, H. B. Schlegel, G. E. Scuseria, M. A. Robb, J. R. Cheeseman, G. Scalmani, V. Barone, G. A. Petersson, H. Nakatsuji, X. Li, M. Caricato, A. Marenich, J. Bloino, B. G. Janesko, R. Gomperts, B. Mennucci, H. P. Hratchian, J. V. Ortiz, A. F. Izmaylov, J. L. Sonnenberg, D. Williams-Young, F. Ding, F. Lipparini, F. Egidi, J. Goings, B. Peng, A. Petrone, T. Henderson, D. Ranasinghe, V. G. Zakrzewski, J. Gao, N. Rega, G. Zheng, W. Liang, M. Hada, M. Ehara, K. Toyota, R. Fukuda, J. Hasegawa, M. Ishida, T. Nakajima, Y. Honda, O. Kitao, H. Nakai, T. Vreven, K. Throssell, J. A. Montgomery, Jr., J. E. Peralta, F. Ogliaro, M. Bearpark, J. J. Heyd, E. Brothers, K. N. Kudin, V. N. Staroverov, T. Keith, R. Kobayashi, J. Normand, K. Raghavachari, A. Rendell, J. C. Burant, S. S. Iyengar, J. Tomasi, M. Cossi, J. M. Millam, M. Klene, C. Adamo, R. Cammi, J. W. Ochterski, R. L. Martin, K. Morokuma, O. Farkas, J. B. Foresman, and D. J. Fox, Gaussian, Inc., Wallingford CT, 2016.
4. S. Cheng, J. Han, X. Wang, K. Yuan, X. Jian and J. Wang, Oxidatively stable thermosets derived from thermal copolymerization of acetylene-terminated imide monomer with an acetylenic monomer containing carborane, *Polymer*, 2017, 115, 96-105.
5. S. Cheng, L. Zong, K. Yuan, J. Han, X. Jian and J. Wang, Synthesis and thermal properties of an acetylenic monomer containing boron and silicon, *RSC Advances*, 2016, 6, 88403-88410.
6. I. Sako, N. Kishimoto, H. Otani, T. Nishiuchi, H. Shimizu and M. Iyoda, Synthesis of Cyclic Oligomers of 4,4'-Diethynyl-4',5'-dioctyl-o-

---

terphenyl Using Eglinton Coupling Reaction: Formation of Large Cyclic Oligomers as Major Products under Standard Conditions, *Bull. Chem. Soc. Jpn.*, 2017, 90, 1244-1250.



## 5. Structural Characterization

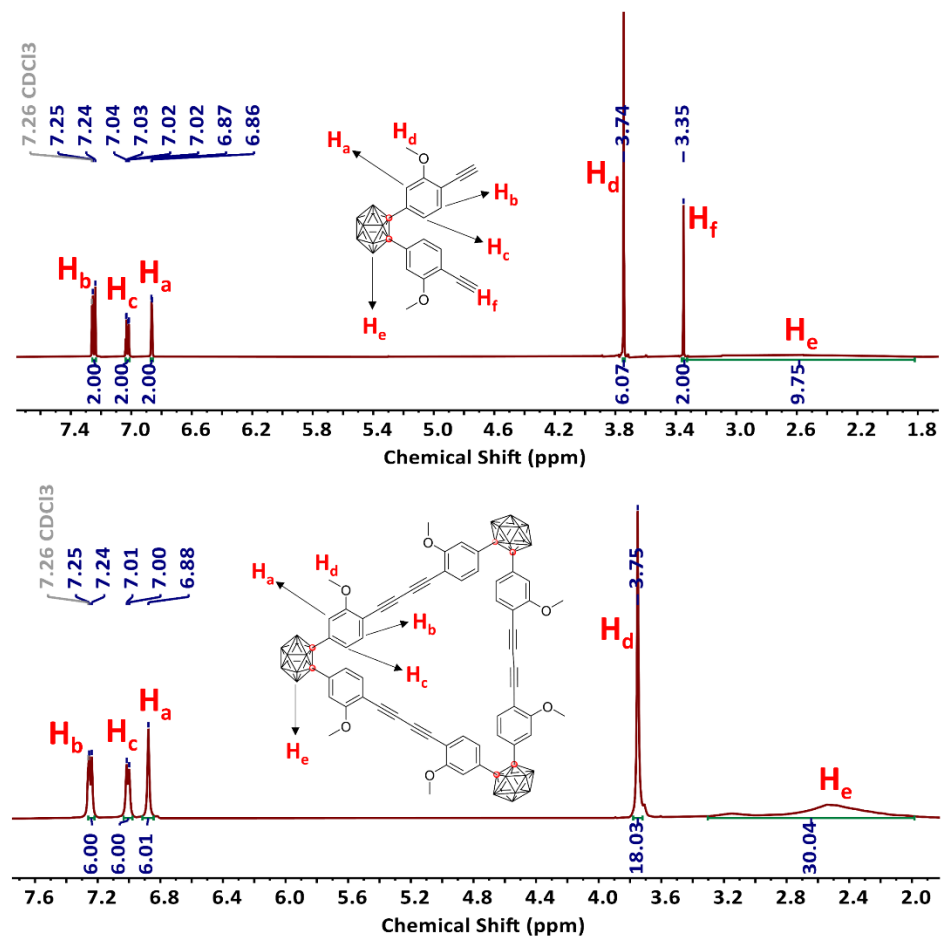

Figure S24  $^1\text{H}$  NMR spectrum of **3b** and **4b** in  $\text{CDCl}_3$ .

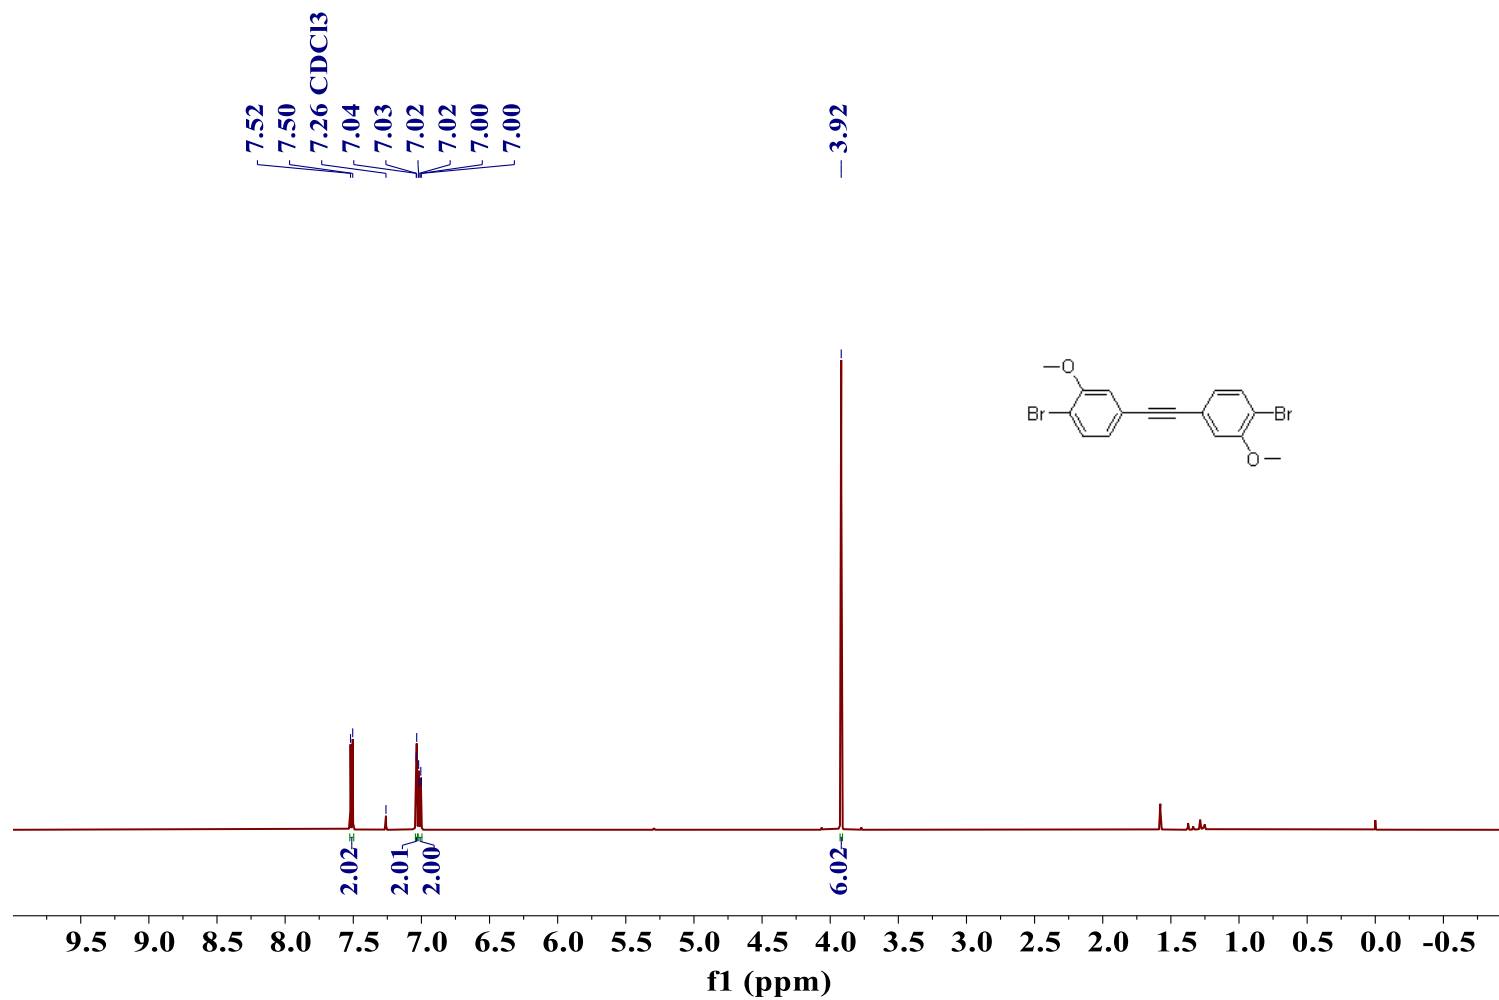

Figure S25 <sup>1</sup>H NMR spectrum of **1b** in CDCl<sub>3</sub>.

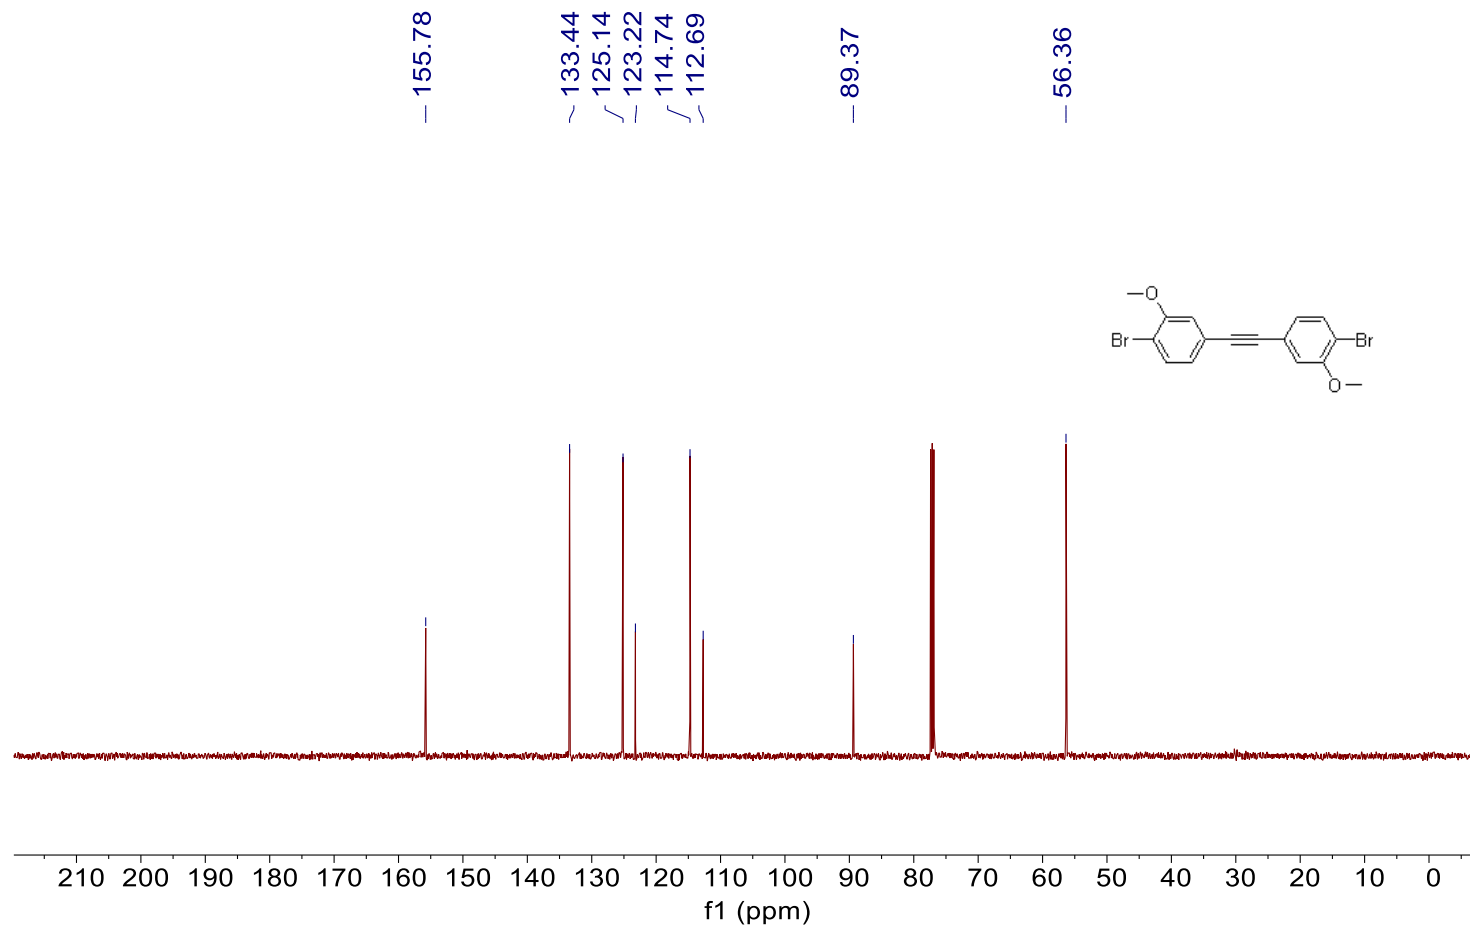

**Figure S26** <sup>13</sup>C NMR spectrum of **1b** in CDCl<sub>3</sub>.

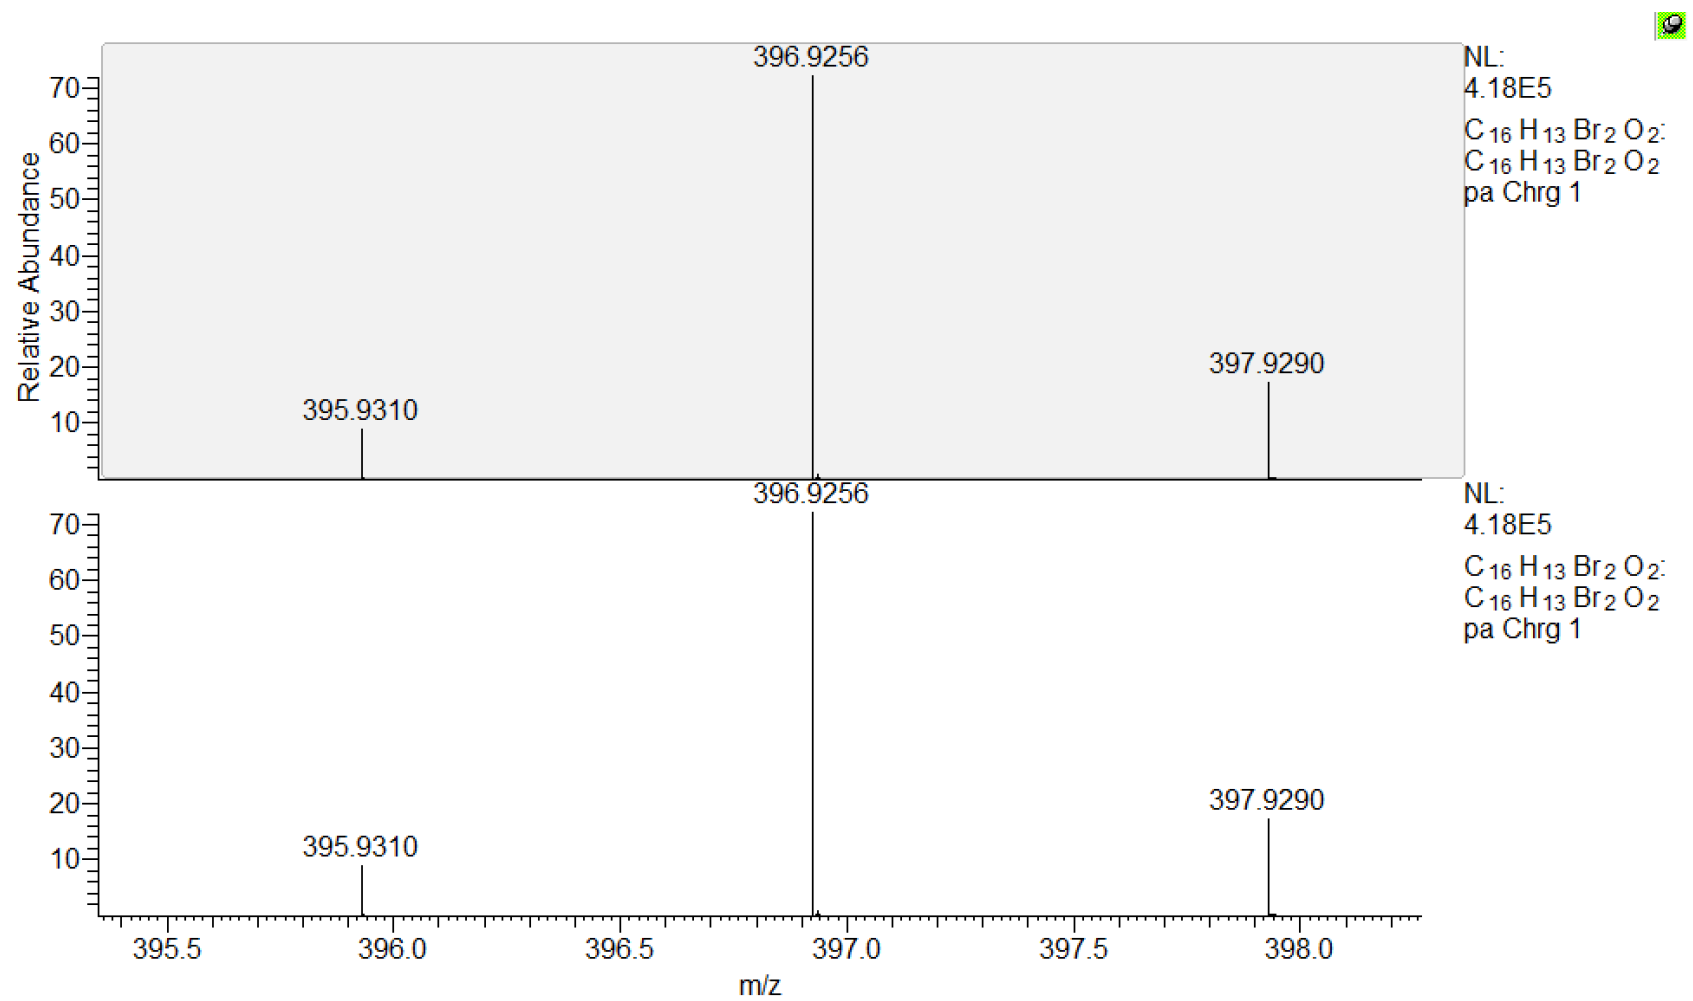

**Figure S27** HRMS spectrum of **1b**.

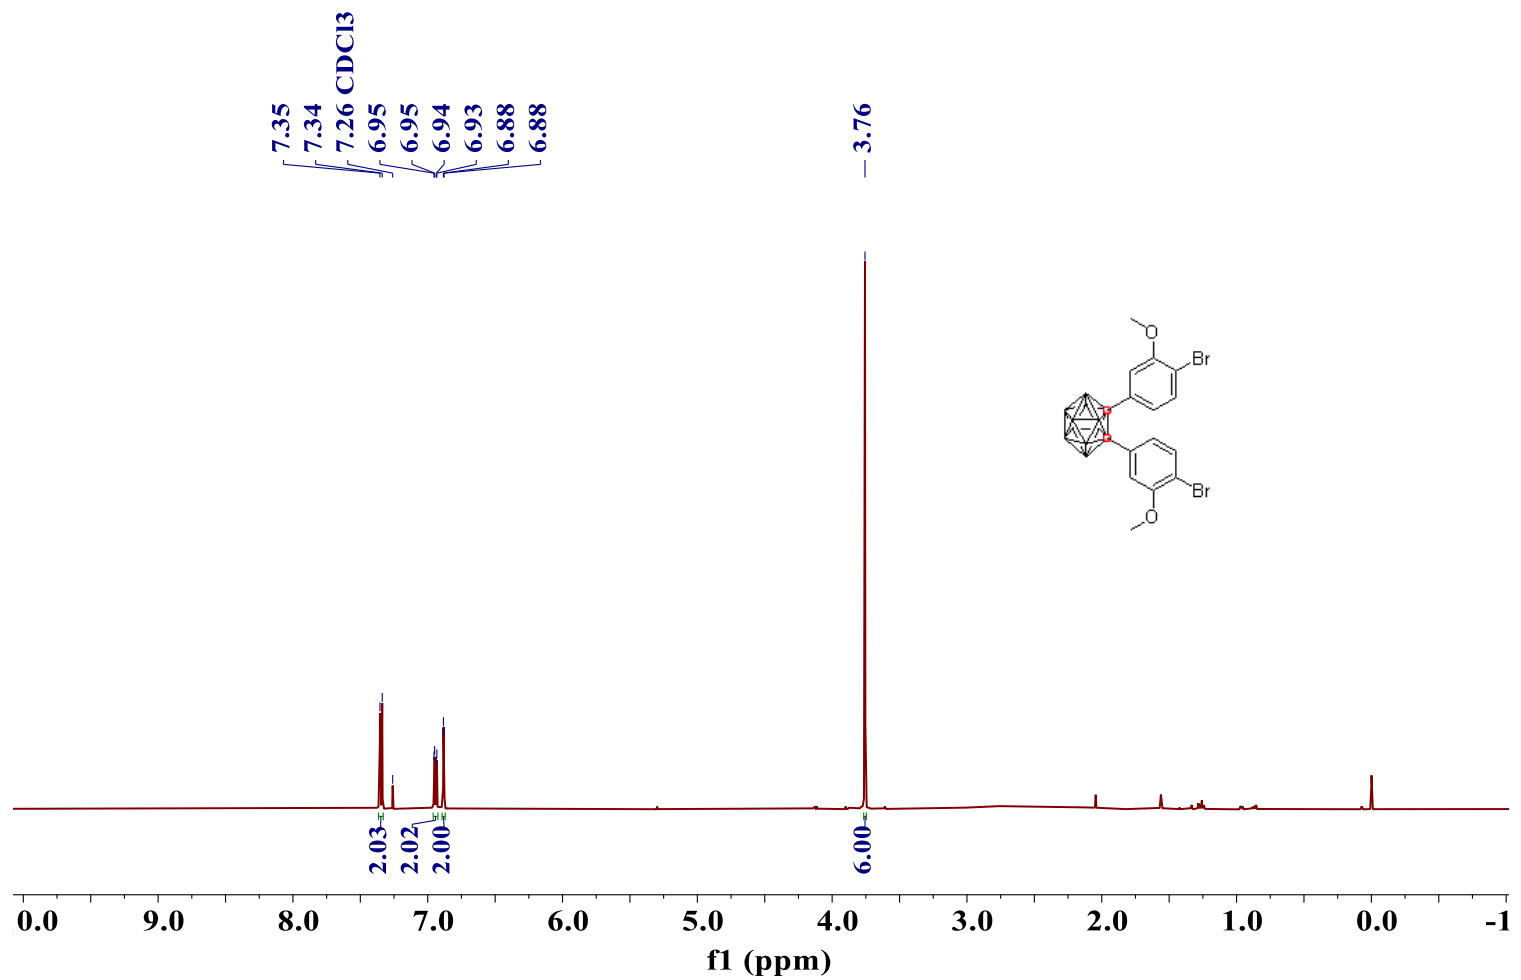

Figure S28 <sup>1</sup>H NMR spectrum of **2b** in CDCl<sub>3</sub>.

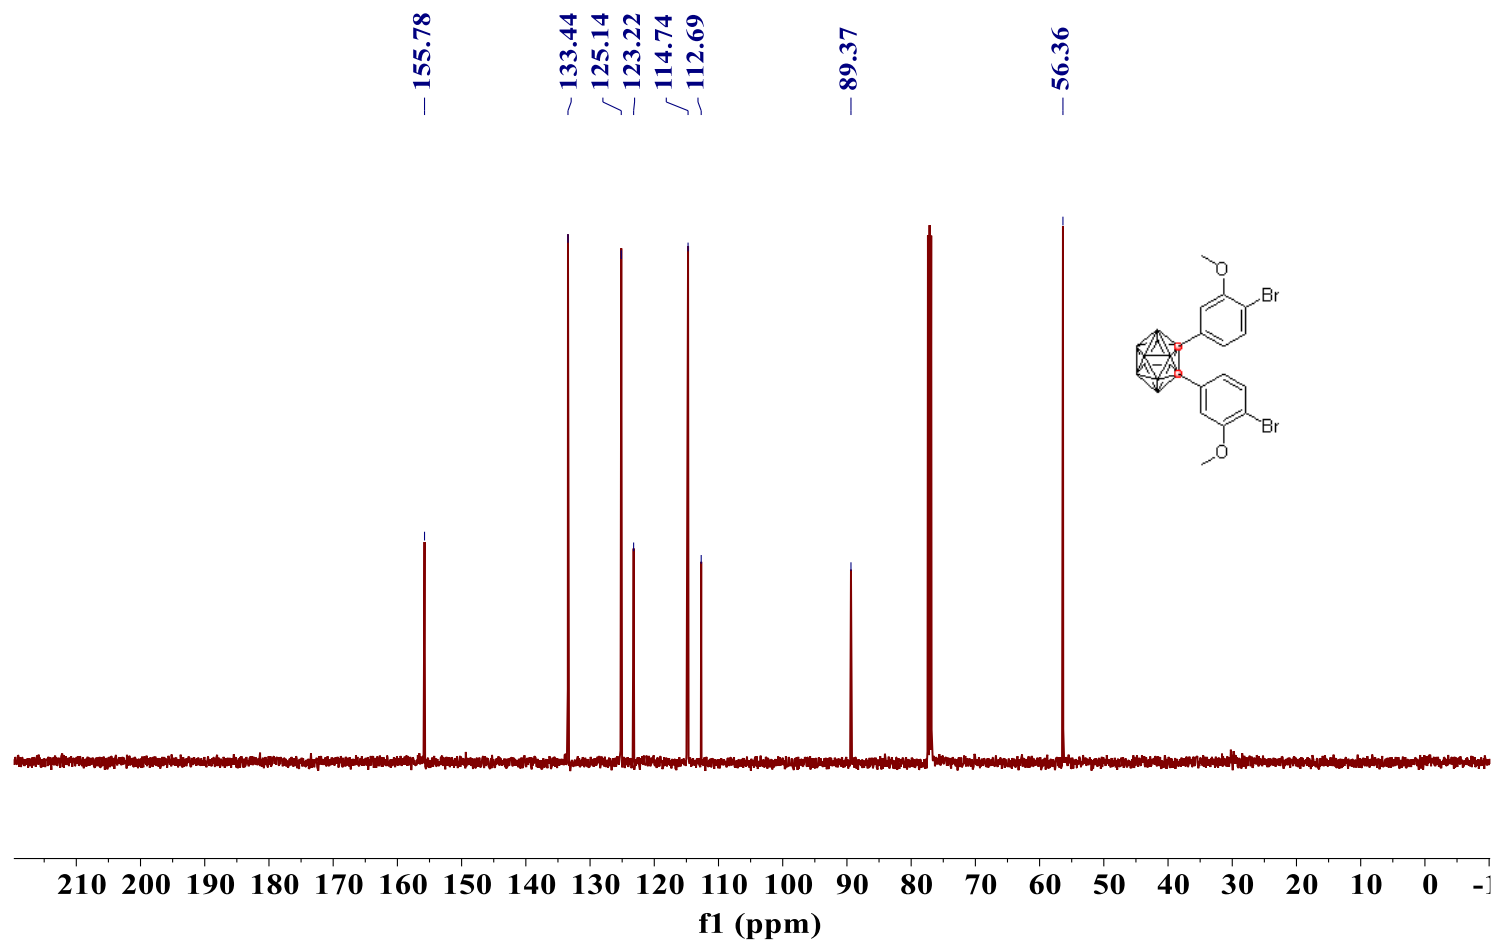

Figure S29  $^{13}\text{C}$  NMR spectrum of **2b** in  $\text{CDCl}_3$ .

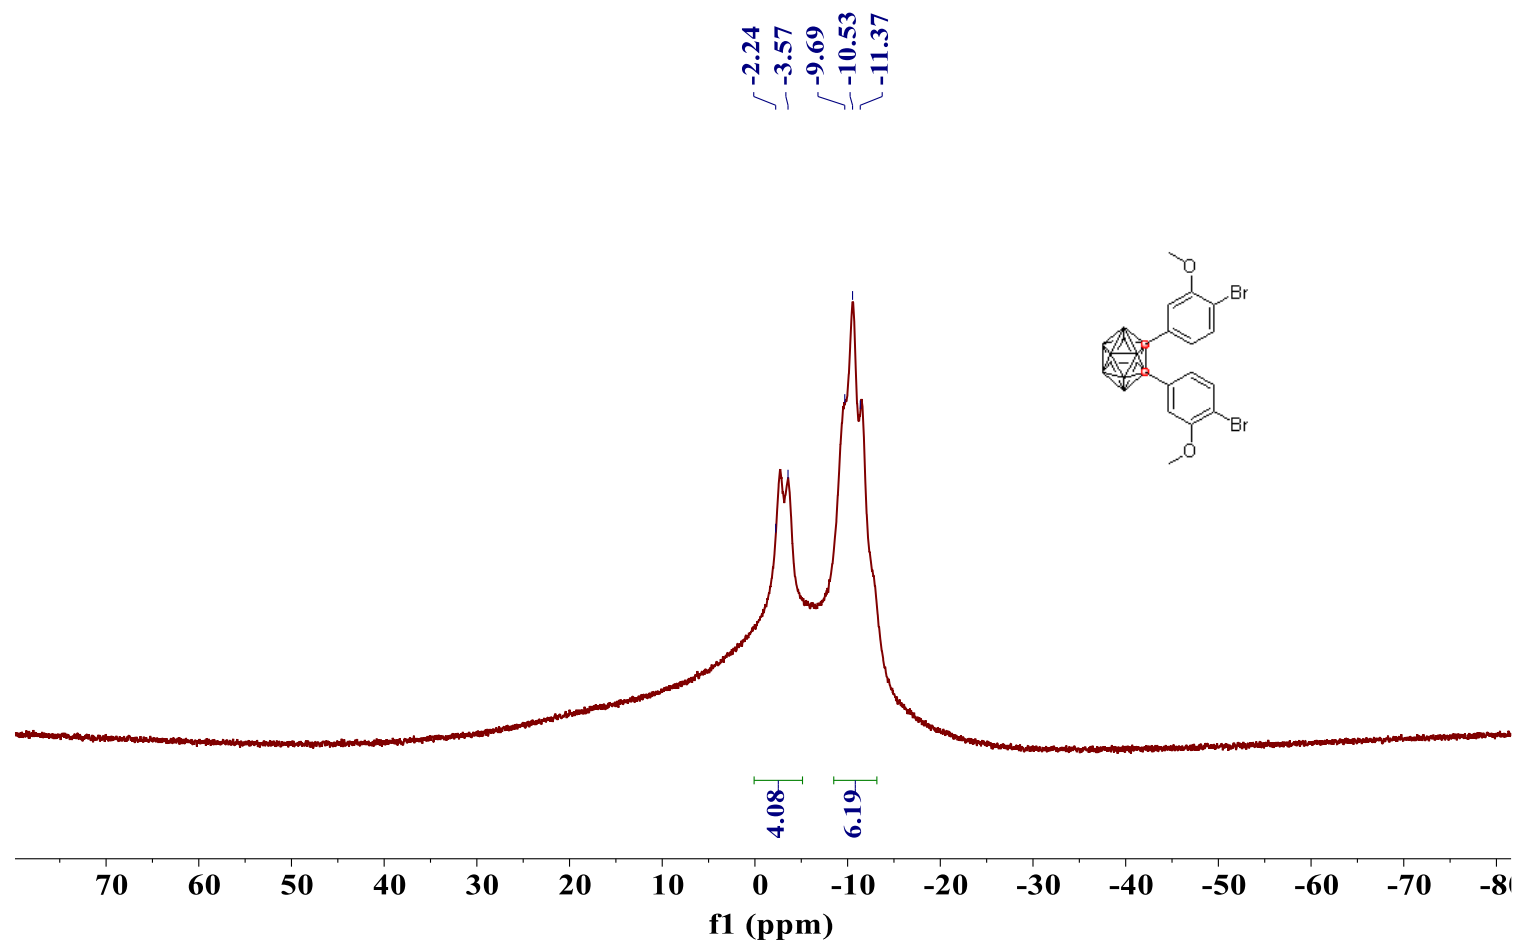

Figure S30  $^{11}\text{B}$  NMR spectrum of **2b** in  $\text{CDCl}_3$ .

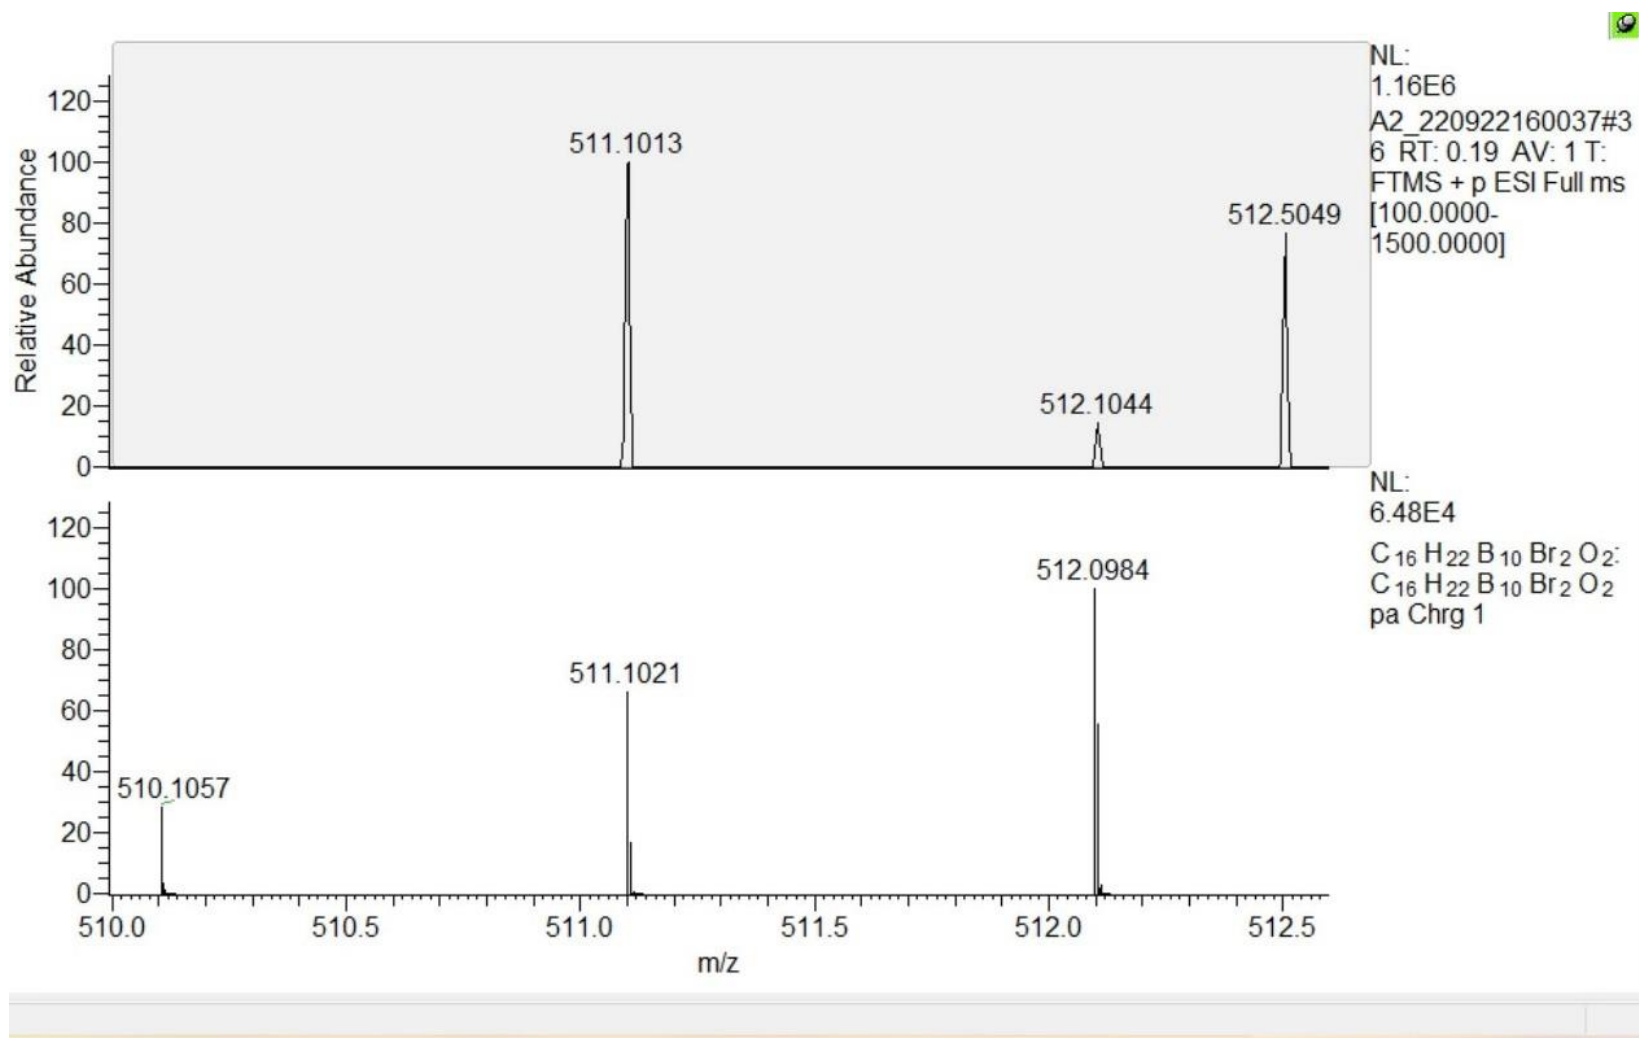

Figure S31 HRMS spectrum of 2b.



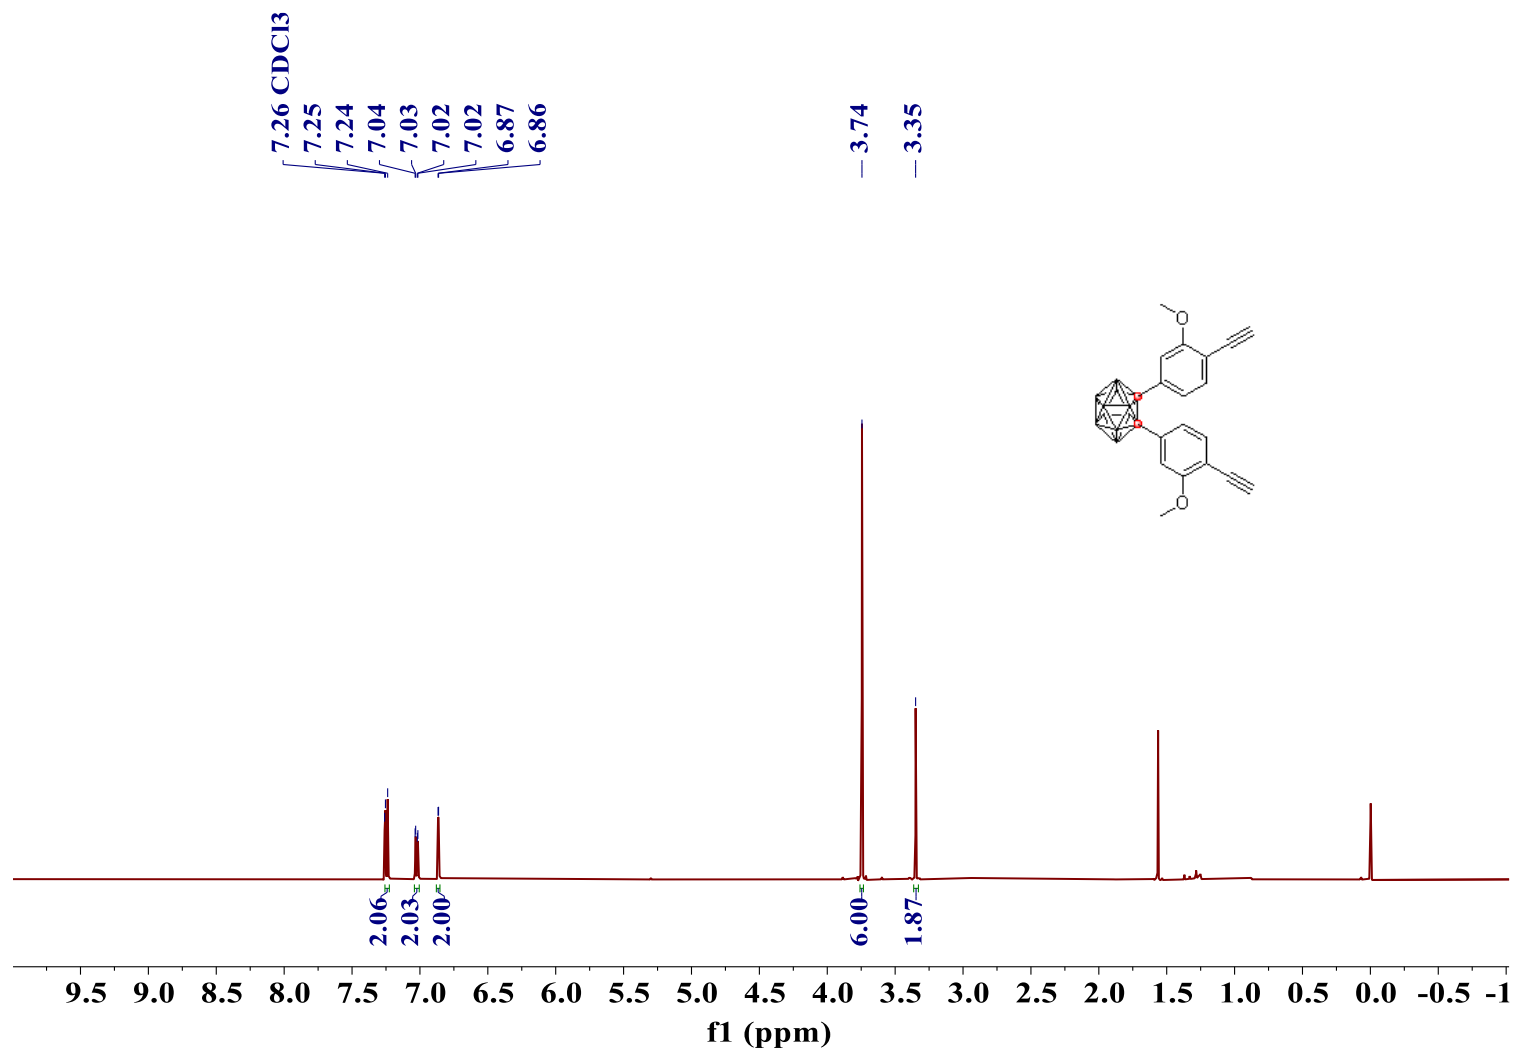

Figure S32 <sup>1</sup>H NMR spectrum of **3b** in CDCl<sub>3</sub>.

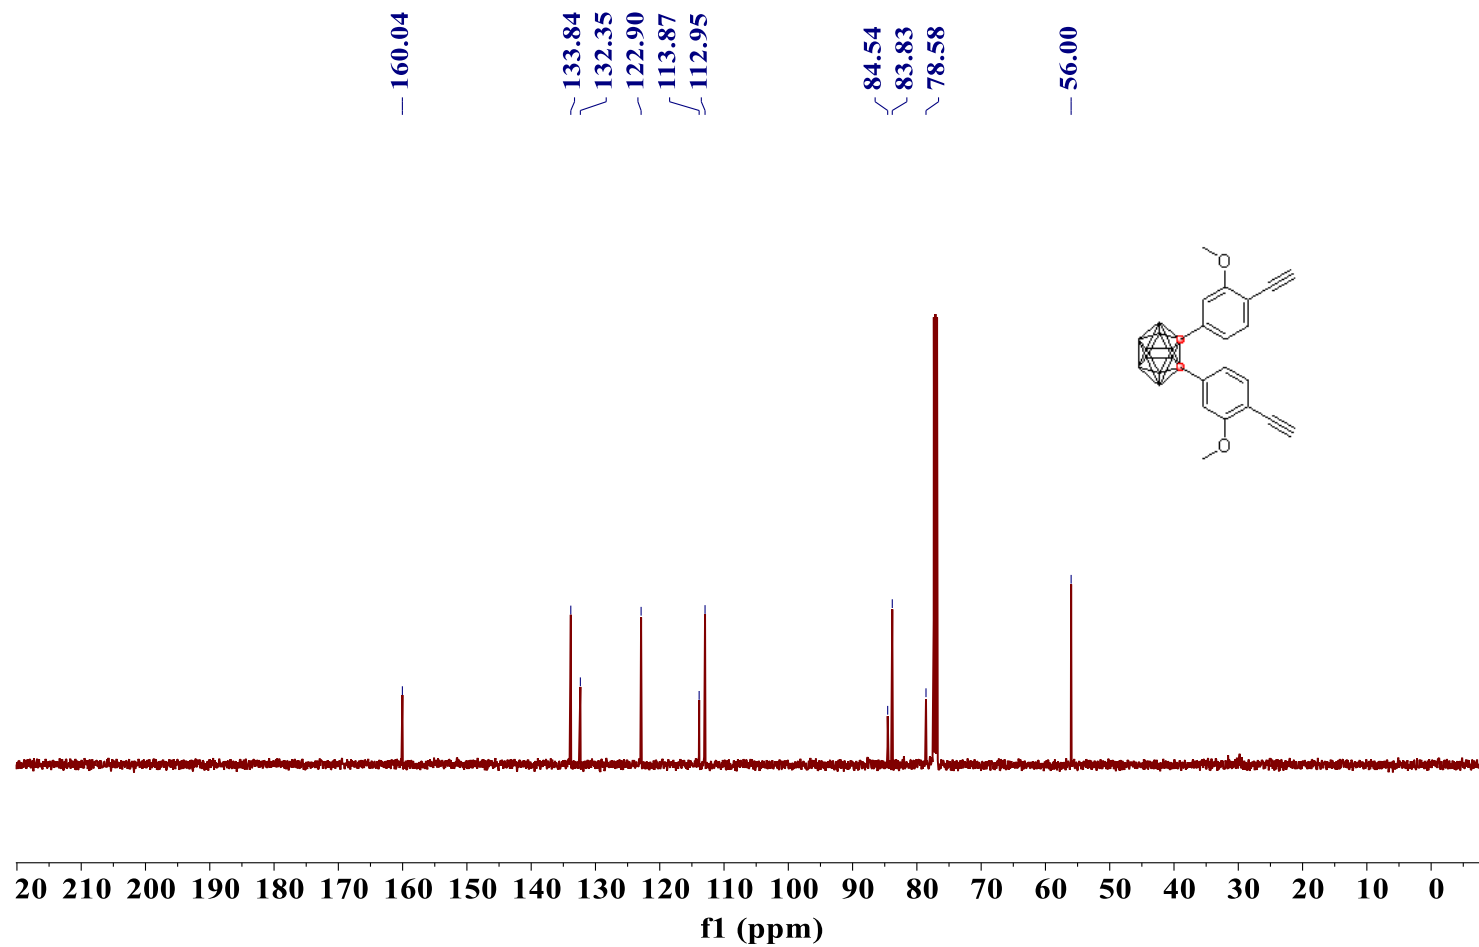

Figure S33  $^{13}\text{C}$  NMR spectrum of **3b** in  $\text{CDCl}_3$ .

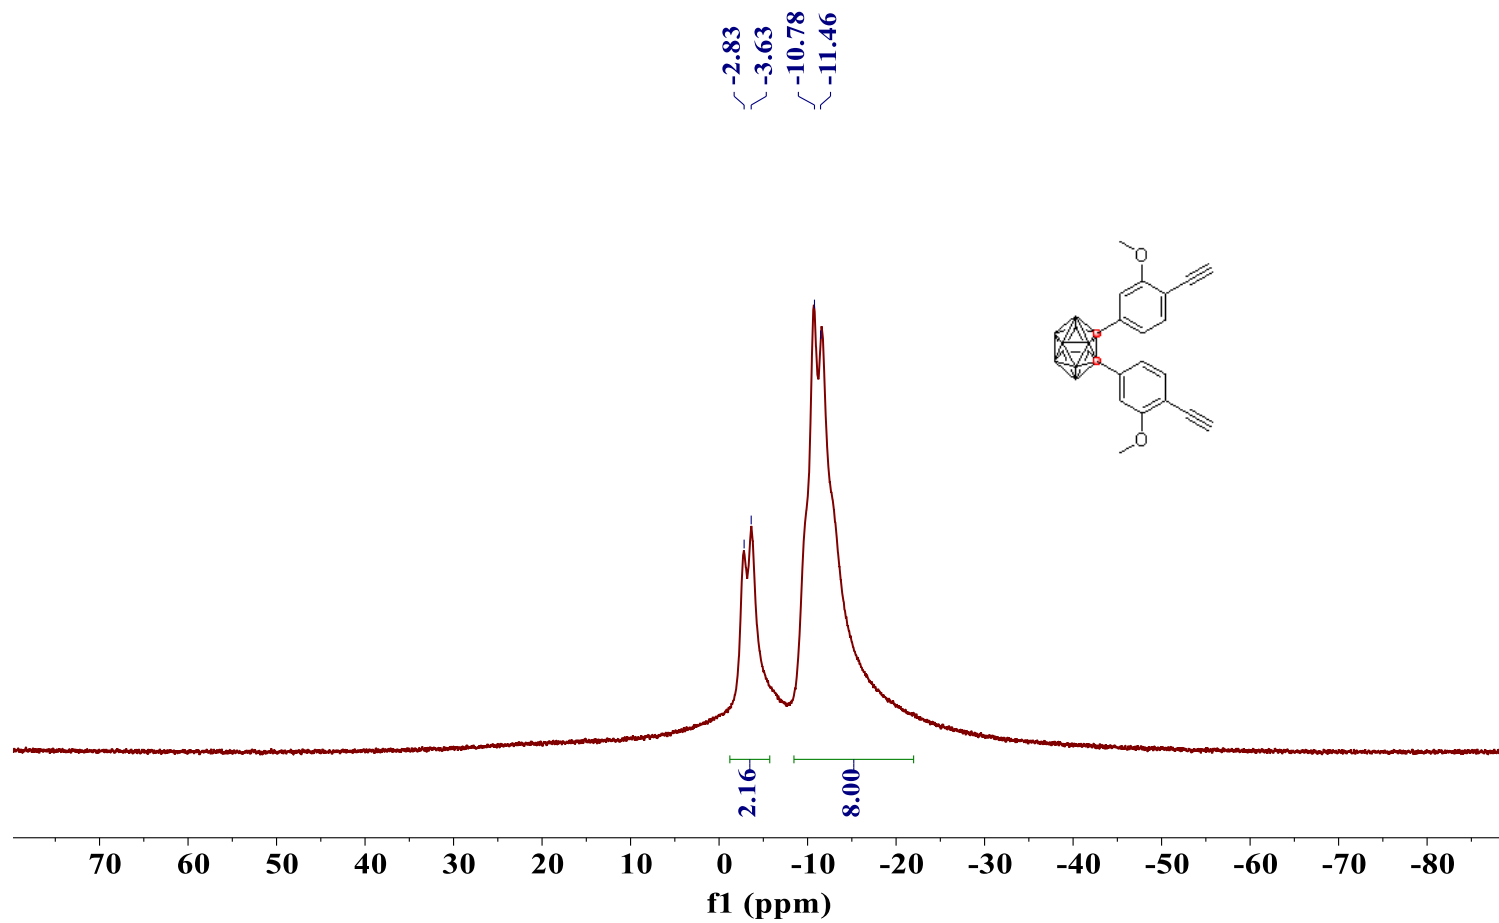

Figure S34  $^{11}\text{B}$  NMR spectrum of **3b** in  $\text{CDCl}_3$ .

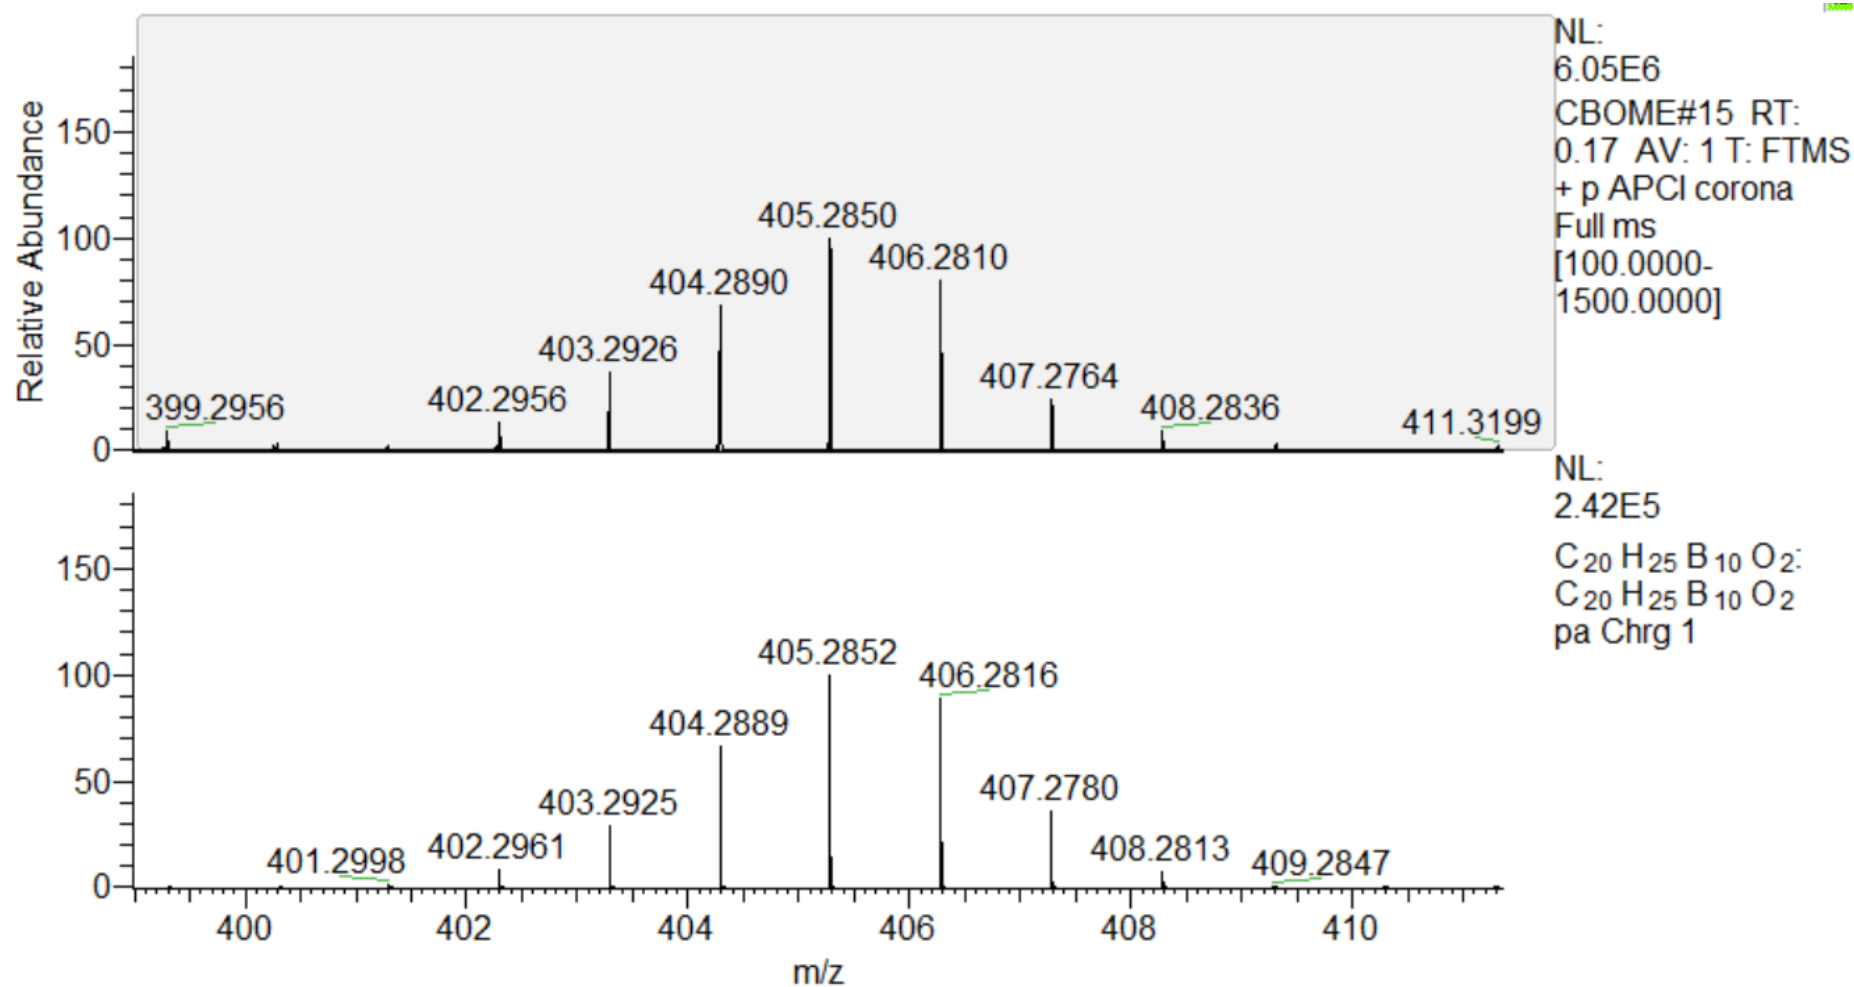

Figure S35 HRMS spectrum of 3b.

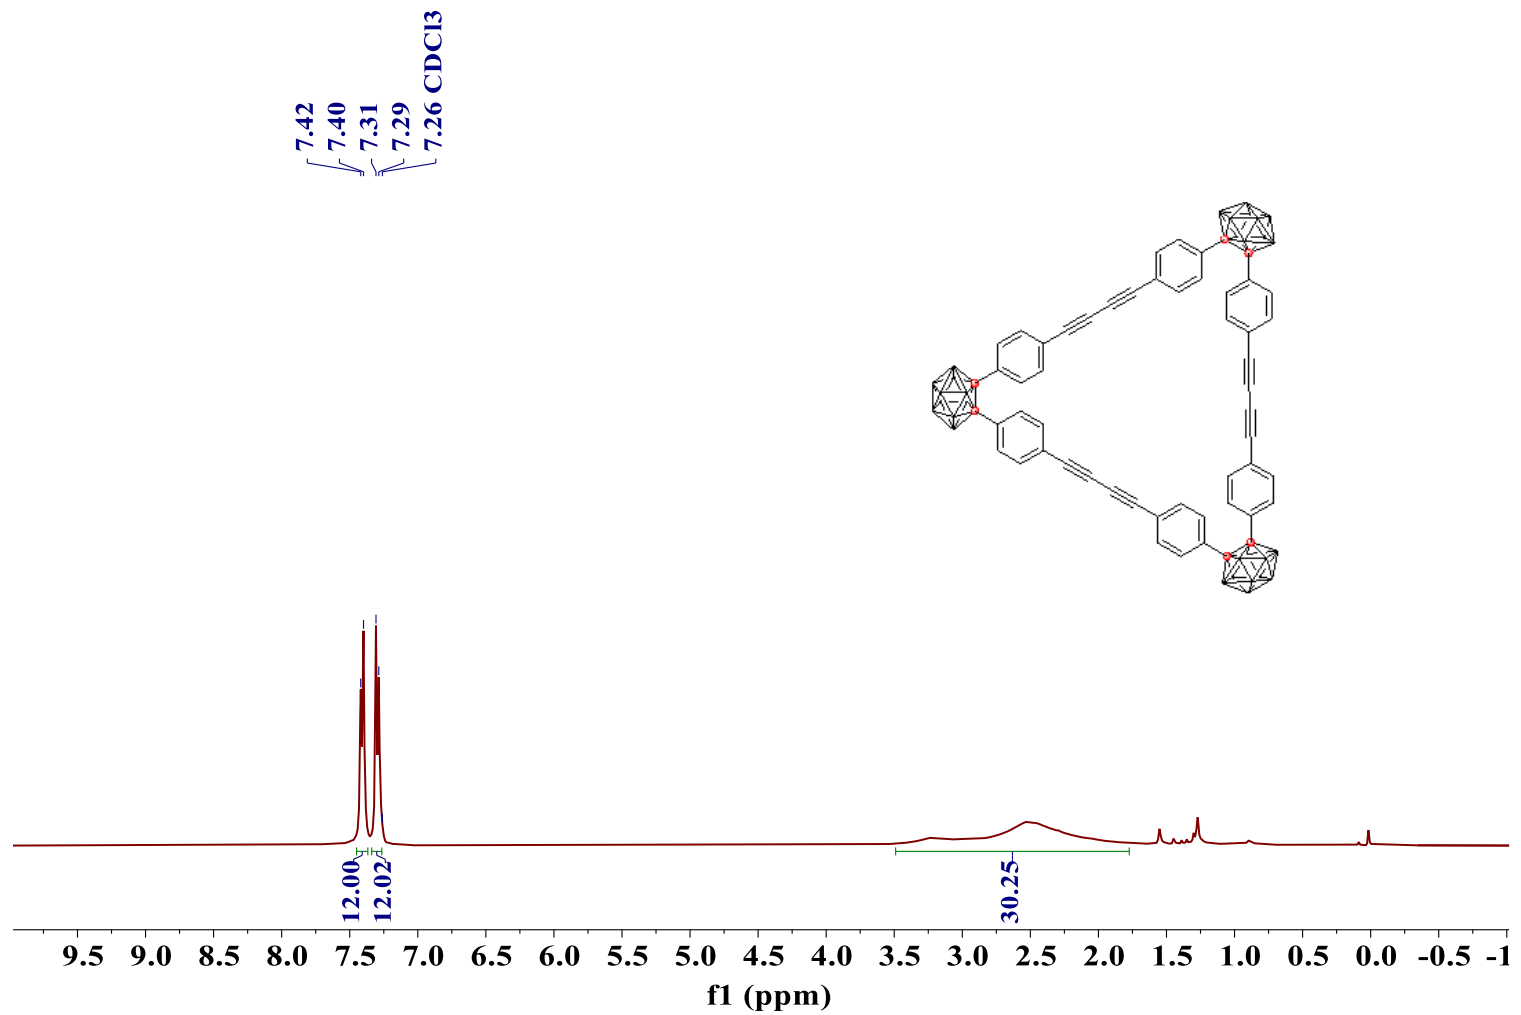

Figure S36 <sup>1</sup>H NMR spectrum of **4a** in CDCl<sub>3</sub>.

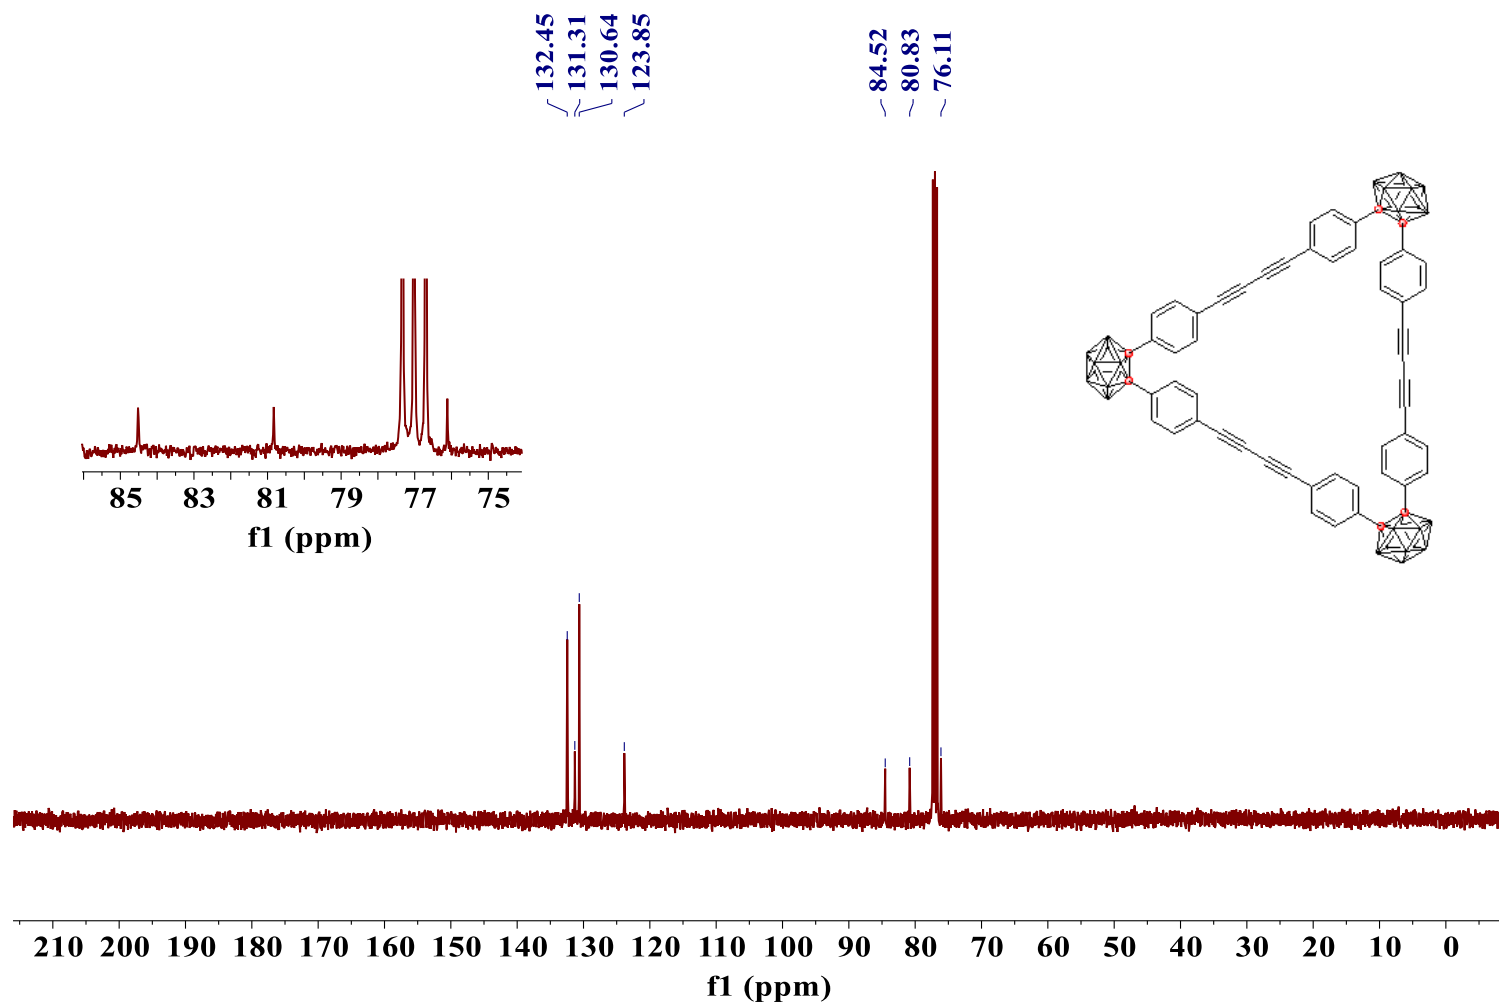

Figure S37  $^{13}\text{C}$  NMR spectrum of **4a** in  $\text{CDCl}_3$ .

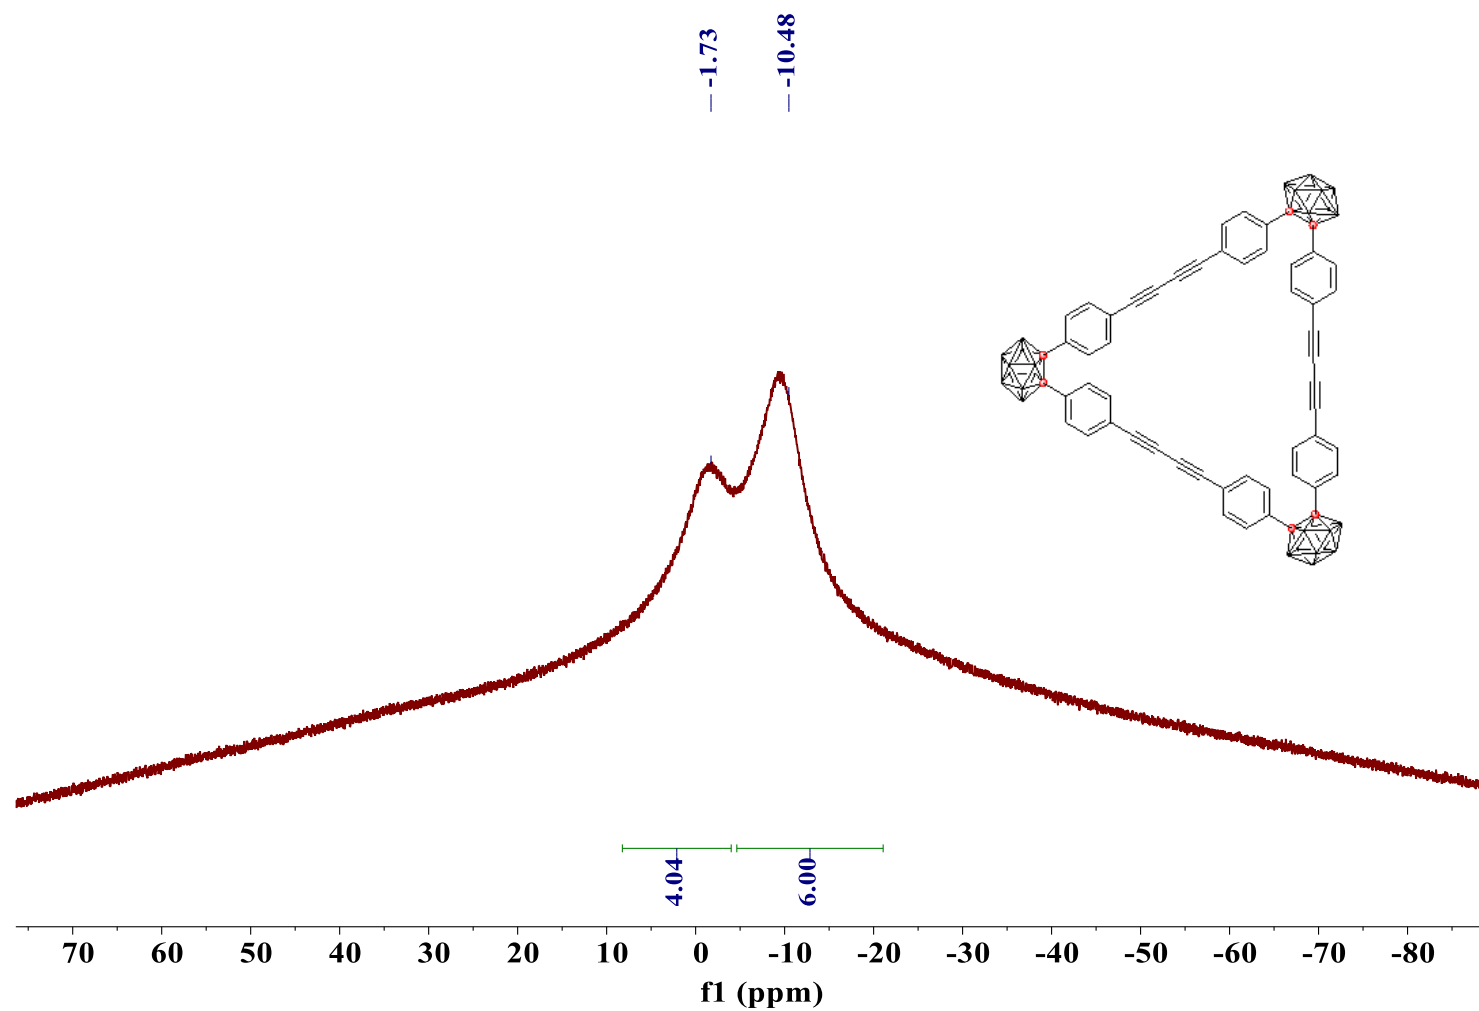

Figure S38  $^{11}\text{B}$  NMR spectrum of **4a** in  $\text{CDCl}_3$ .

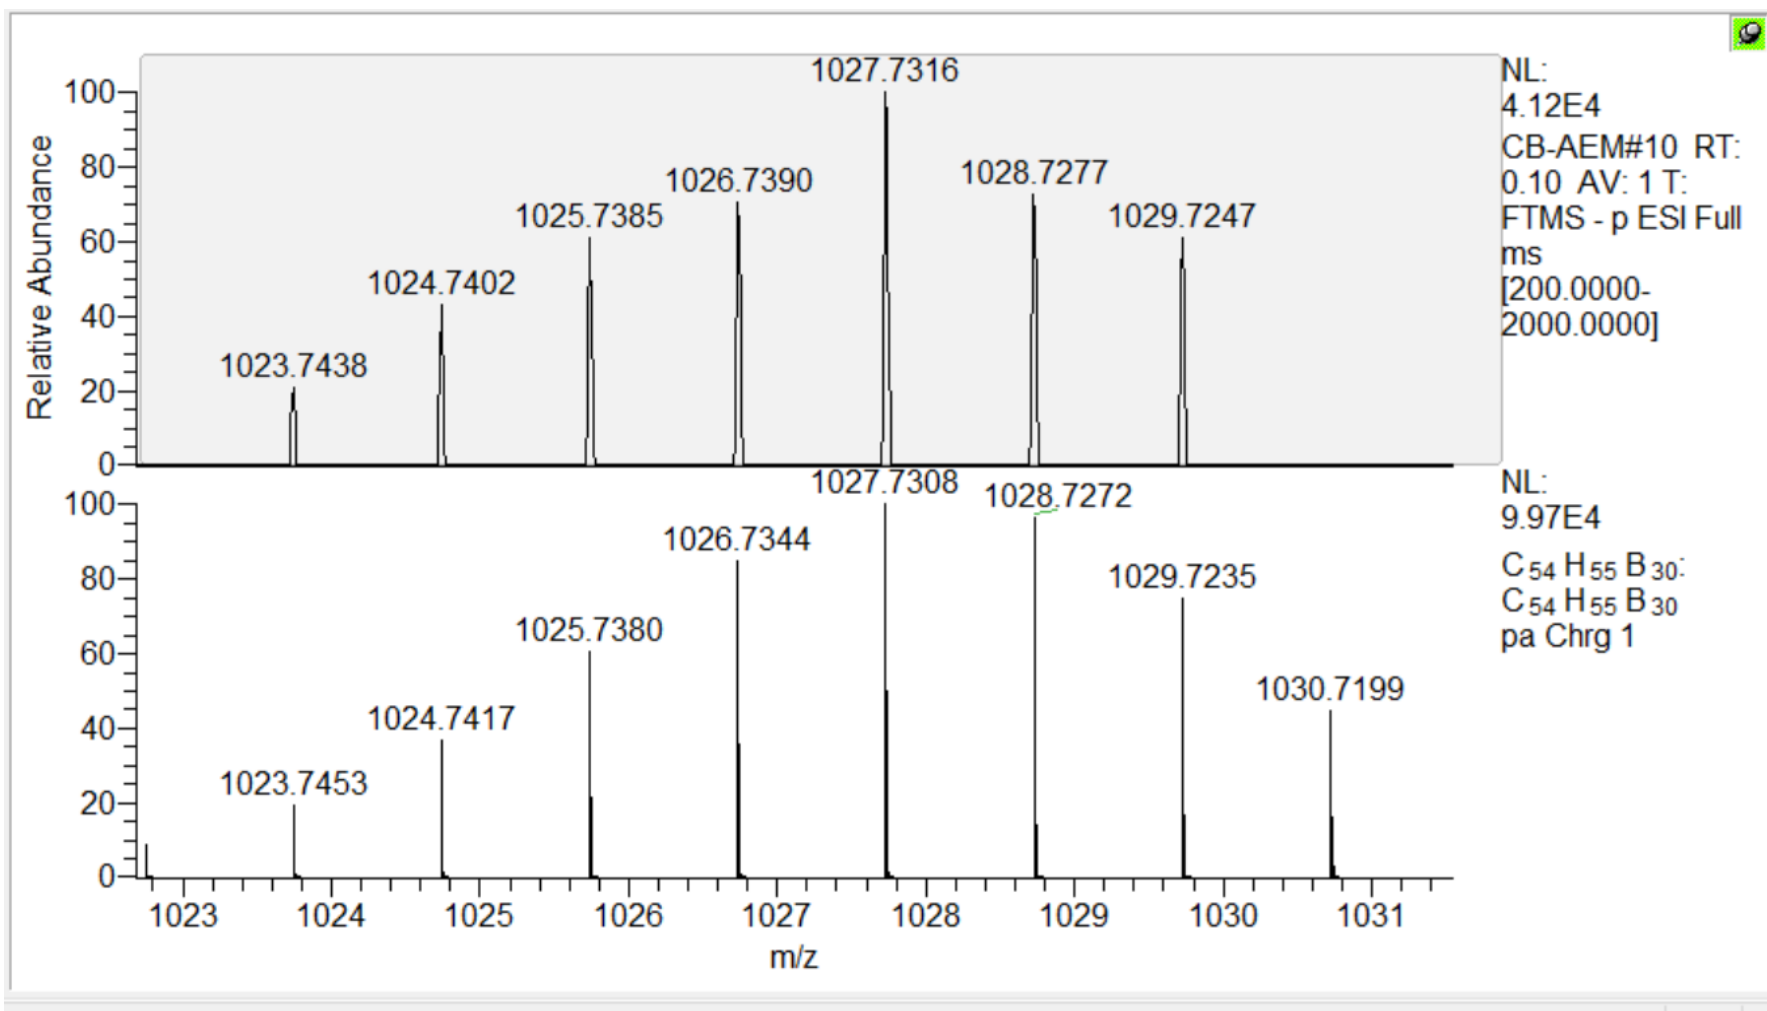

Figure S39 HRMS spectrum of 4a.



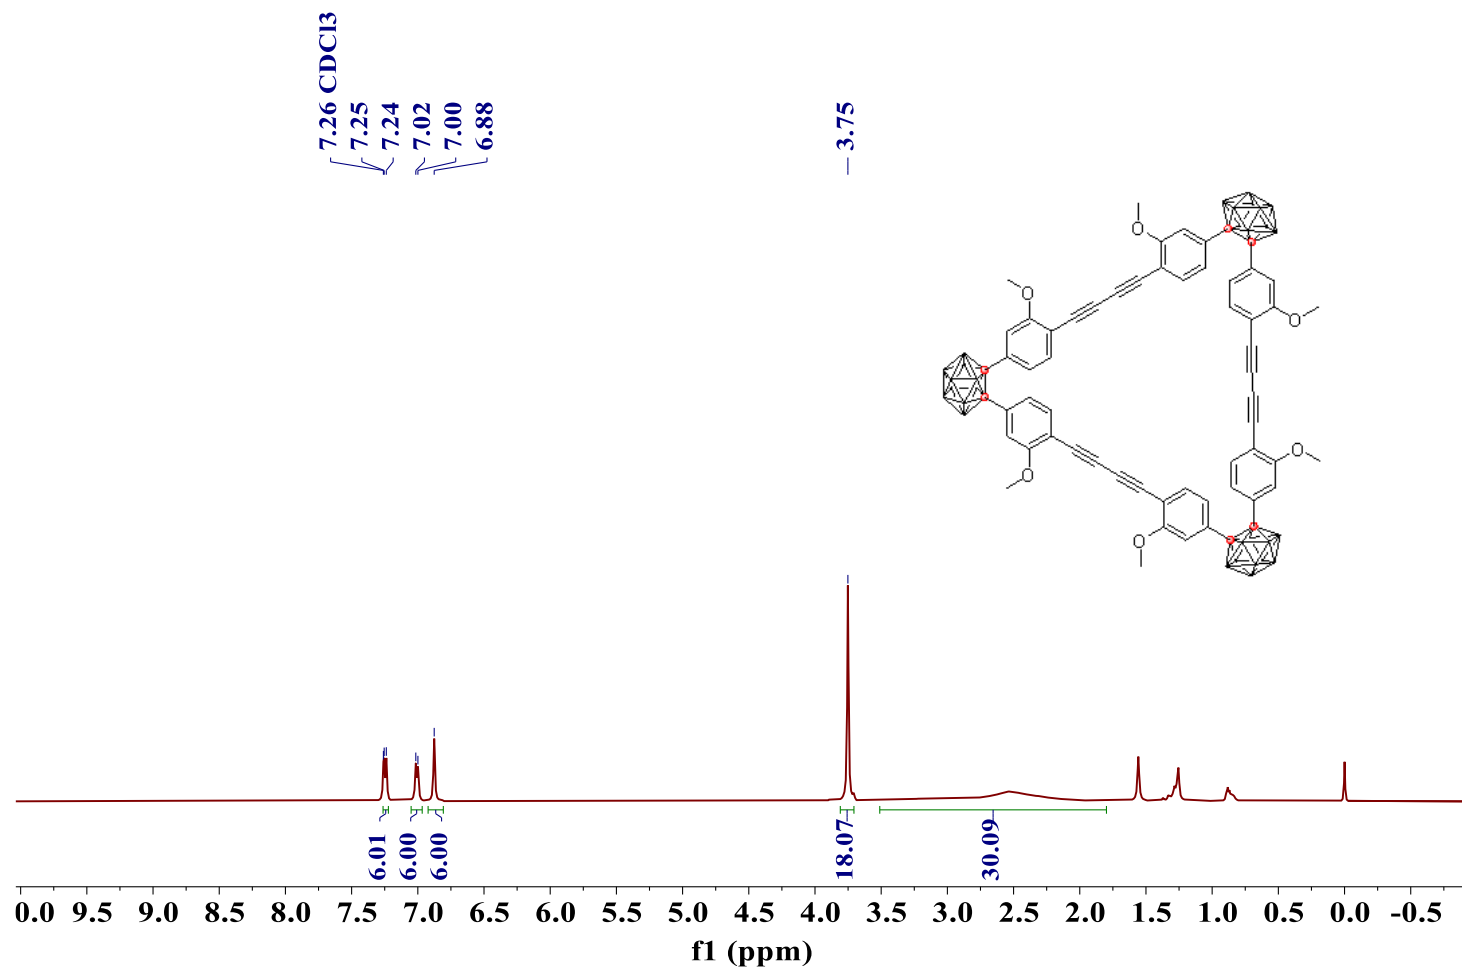

Figure S40 <sup>13</sup>C NMR spectrum of **4b** in CDCl<sub>3</sub>.

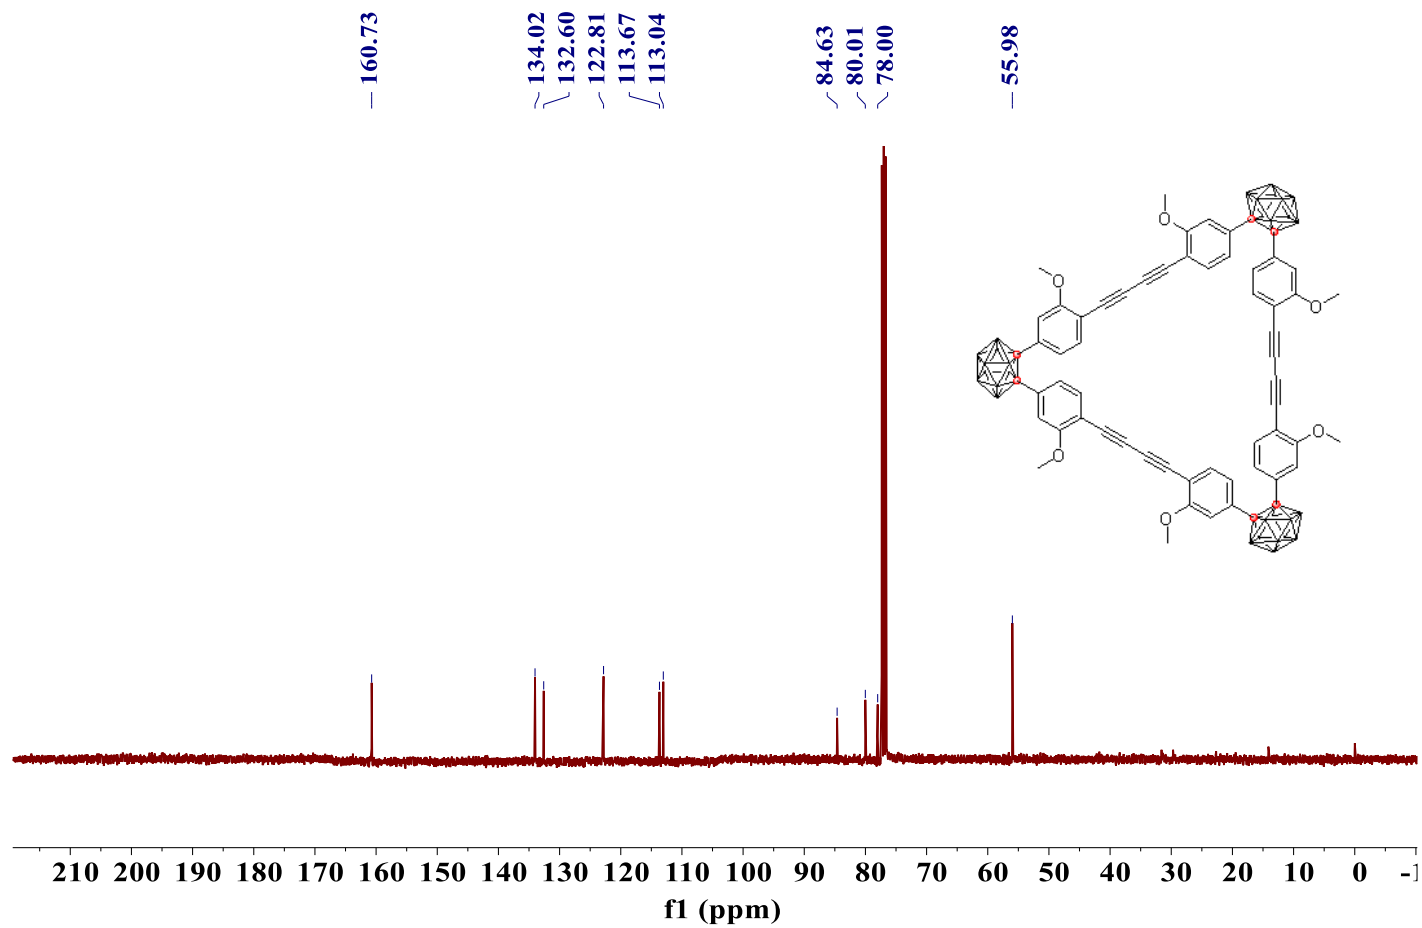

Figure S41  $^1\text{H}$  NMR spectrum of **4b** in  $\text{CDCl}_3$ .

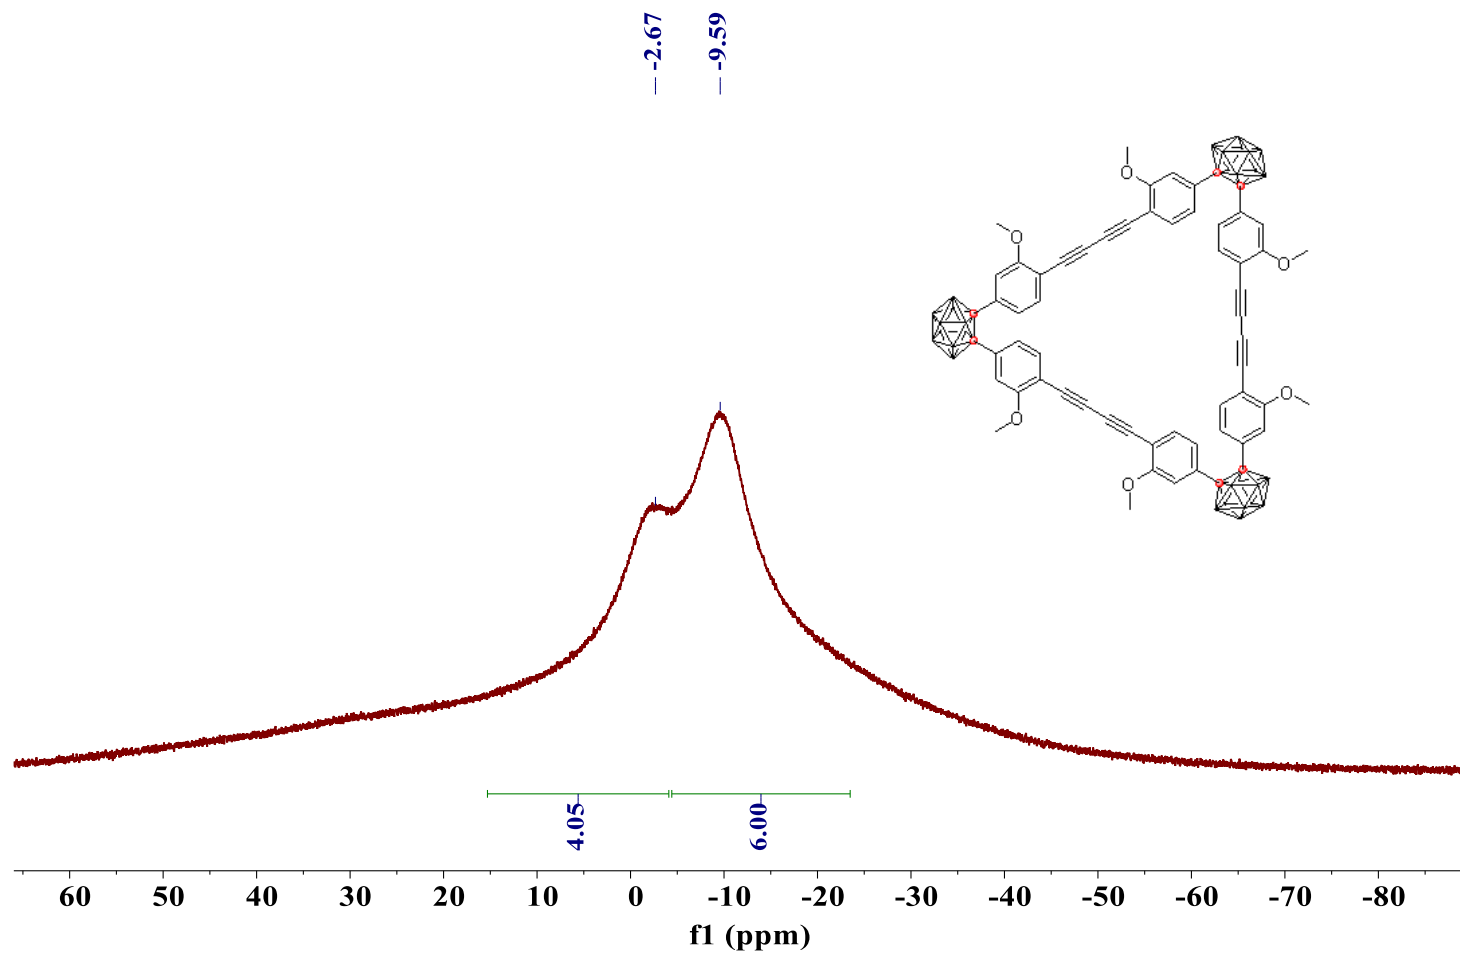

Figure S42 <sup>11</sup>B NMR spectrum of **4b** in CDCl<sub>3</sub>.

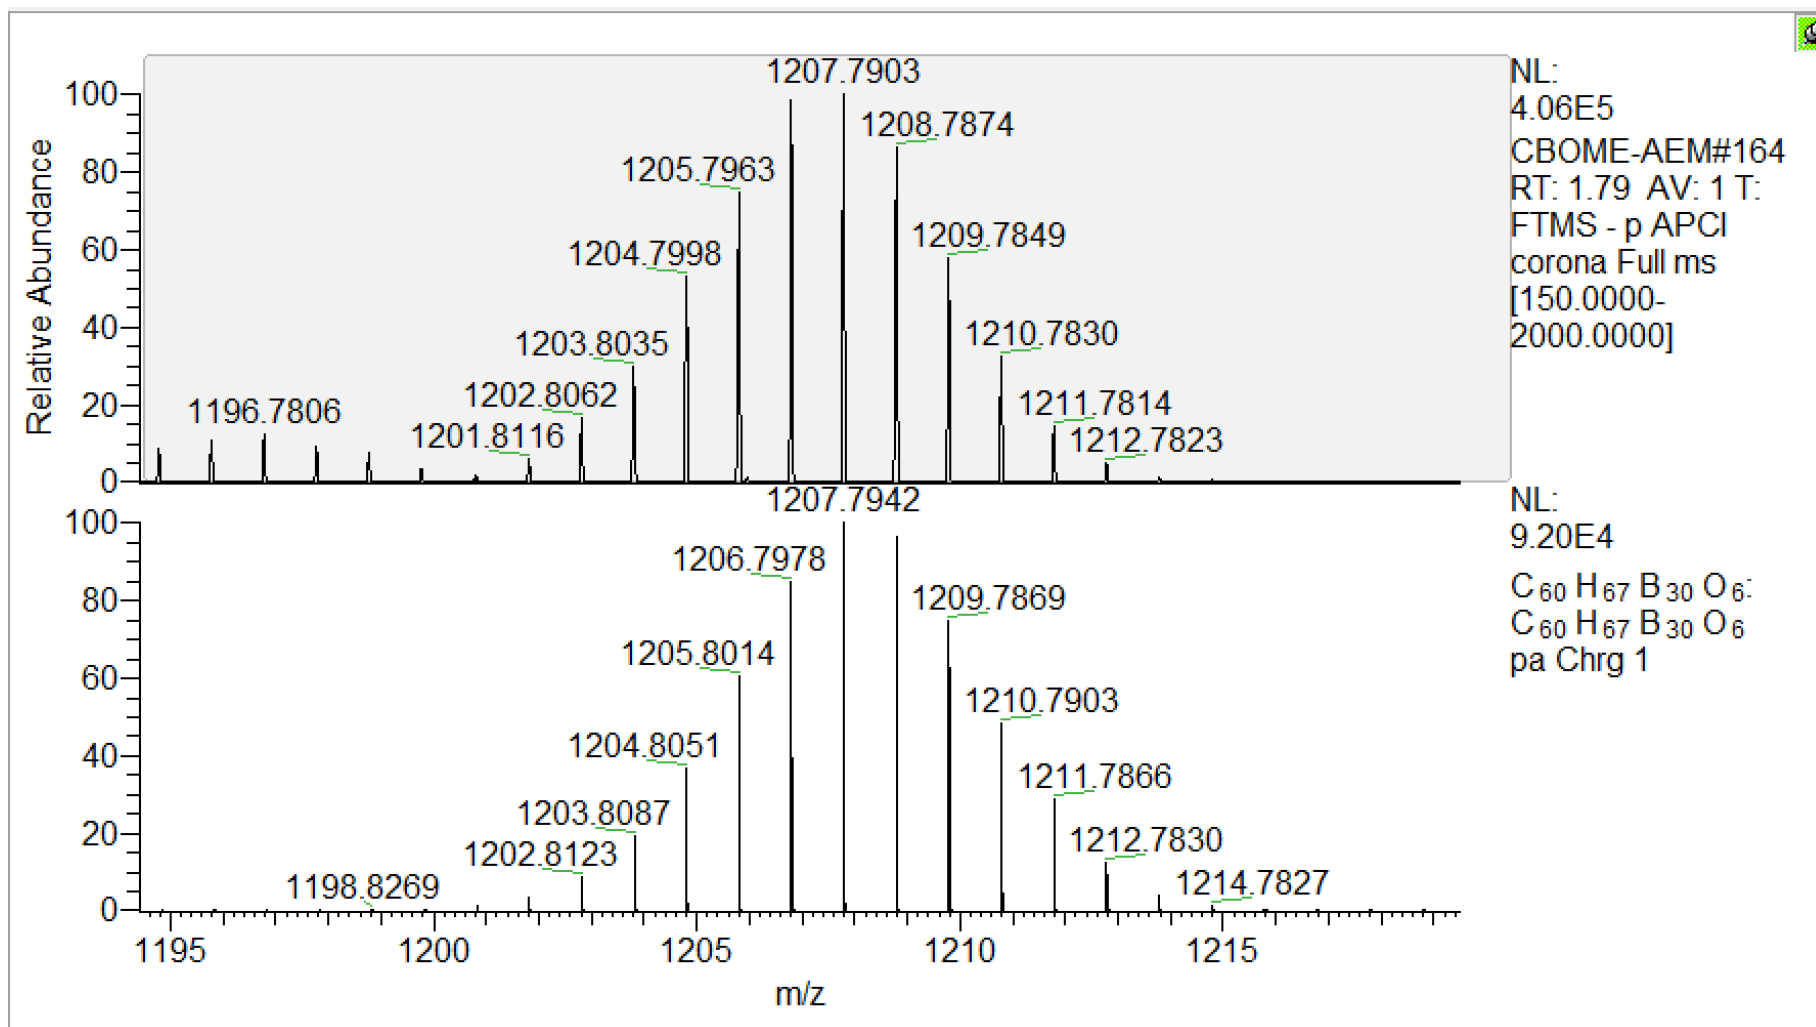

Figure S43 HRMS spectrum of 4b.
